1 **Noncanonical targeting contributes significantly to miRNA-mediated**  
2 **regulation**

3

4 Jennifer Y. Tan<sup>1</sup>, Baroj Abdulkarim<sup>1</sup>, and Ana C. Marques<sup>1</sup>

5

6 <sup>1</sup>Department of Computational Biology, University of Lausanne, Switzerland

7 Corresponding authors: [anaclaudia.marques@unil.ch](mailto:anaclaudia.marques@unil.ch); [jennifer.tan@unil.ch](mailto:jennifer.tan@unil.ch).

8

## 1 **ABSTRACT**

2 Determining which genes are targeted by miRNAs is crucial to elucidate their  
3 contributions to diverse biological processes in health and disease. Most  
4 miRNA target prediction tools rely on the identification of complementary  
5 regions between transcripts and miRNAs. Whereas important for target  
6 recognition, the presence of complementary sites is not sufficient to identify  
7 transcripts targeted by miRNAs.

8 Here, we describe an unbiased statistical genomics approach that explores  
9 genetically driven changes in gene expression between human individuals.  
10 Using this approach, we identified transcripts that respond to physiological  
11 changes in miRNA levels. We found that a much smaller fraction of mRNAs  
12 expressed in lymphoblastoid cell lines (LCLs) than what is predicted by other  
13 tools is targeted by miRNAs. We estimate that each miRNA has a relatively  
14 small number of targets. The transcripts we predict to be miRNA targets are  
15 enriched in AGO-binding and previously validated miRNAs target interactions,  
16 supporting the reliability of our predictions. Consistent with previous analysis,  
17 these targets are also enriched among dosage sensitive and highly controlled  
18 genes.

19 Almost a third of genes we predict to be miRNA targets lack sequence  
20 complementarity to the miRNA seed region (noncanonical targets). These  
21 noncanonical targets have higher complementarity with the miRNA 3' end. The  
22 impact of miRNAs on the levels of their canonical or noncanonical targets is  
23 identical supporting the relevance of this poorly explored mechanism of  
24 targeting.

25

## 1 INTRODUCTION

2

3 Post-transcriptional regulation by microRNAs (miRNAs) is widespread in  
4 eukaryotes (Bartel 2004). These small (20-22 nucleotide) noncoding RNAs  
5 guide target recognition by the miRNA-Induced Silencing Complex (miRISC),  
6 which in turn leads to transcript degradation or translational repression (Bartel  
7 2004). In animals, loss of function mutations in miRISC proteins (Kataoka et al.  
8 2001; Alisch et al. 2007; Morita et al. 2007; Vasquez-Rifo et al. 2012) or proteins  
9 involved in miRNA maturation (Bernstein et al. 2003; Wienholds et al. 2003;  
10 Giraldez et al. 2005; Wang et al. 2008) are embryonically lethal. This highlights  
11 the importance of post-transcriptional regulation by miRNAs, particularly during  
12 early development. In contrast, the phenotypes associated with loss of function  
13 mutations in individual miRNAs are often cell/tissue specific, consistent with the  
14 spatial and temporally restricted expression of most miRNAs (reviewed in  
15 (Bartel 2018)). The penetrance and impact of miRNA loss of function mutations  
16 is also highly heterogenous, ranging for example from postnatal lethality  
17 (Heidersbach et al. 2013) to increased susceptibility to genetic or environmental  
18 stressors (Stadthagen et al. 2013). This heterogeneity is likely a consequence  
19 of the diverse functions of genes whose expression is regulated by miRNAs.  
20 Given the importance of miRNAs in diverse biological processes in health and  
21 disease (Bartel 2018), significant efforts have gone into determining the  
22 mechanisms of miRNA targeting and identifying the repertoire of individual  
23 miRNA targets (Eulalio and Mano 2015).

24 In animals, miRNA target recognition often relies on the base pairing between  
25 the miRNA seed region (nucleotides 2-8) and target miRNA recognition  
26 elements (MREs), frequently found at the target 3' untranslated regions (UTRs)  
27 (Bartel 2004). We refer to this miRNA targeting architecture as “canonical”.

28 Over the past decades, a wide array of prediction methods were developed to  
29 establish the miRNA targetome (Peterson et al. 2014). These softwares  
30 primarily rely on identifying well-established canonical signatures of

1 miRNA:target interactions, including sequence complementarity, accessibility,  
2 location and conservation of MREs, as well as favourable binding energy  
3 between miRNA and target (Peterson et al. 2014). Notably, the overlap  
4 between predictions made by different softwares is often small (Sethupathy et  
5 al. 2006) and fewer than 1% of predicted miRNA targets are supported by  
6 experimental evidence for miRISC binding (Fridrich et al. 2019). These  
7 analyses highlight the extent of false predictions and our poor understanding of  
8 the properties that underlie efficient targeting and regulation by miRNAs.  
9 Machine learning approaches, in particular those guided by well-defined  
10 interactions between miRNA and target (McGeary et al. 2019), have the  
11 potential to improve computational prediction of miRNA targets (Schafer and  
12 Ciaudo 2020). But given the scarcity of large and comprehensive sets of true  
13 miRNA targets, the development of such tools is currently restricted.

14 Alternatively, miRNAs targets can be experimentally identified based on the  
15 evidence of their interaction with miRISC or that their expression levels change  
16 in response to genetic miRNA perturbations. Given the ease to measure the  
17 impact of miRNA level changes on gene expression levels transcriptome-wide,  
18 the latter approach has been extensively used (Bartel 2018). However, the  
19 impact of miRNA perturbation on gene expression is 1) often smaller than the  
20 inter-individual variation in transcript levels, suggesting many of these changes  
21 are inconsequential (Pinzon et al. 2017); and 2) this approach does not allow  
22 the distinction between changes due to miRNA targeting (direct) or miRNA-  
23 driven changes in the levels of gene expression regulators, including  
24 transcription factors or RNA binding proteins (indirect) (Thomas et al. 2010).

25 Cross-linking Immunoprecipitation (CLIP) based approaches have been used to  
26 identify transcripts bound by miRISC (reviewed in (Lin and Miles 2019)) *in vitro*  
27 (i.e. (Hafner et al. 2010)) and *in vivo* (i.e. (Li et al. 2019)). Experimental evidence  
28 for AGO-binding greatly increases the accuracy of miRNA target predictions.  
29 However not all transcripts bound by miRISC are miRNA targets (Agarwal et al.  
30 2015). Furthermore, whereas, as expected, transcripts with reproducible  
31 binding are enriched among true targets, they are depleted in lowly abundant  
32 transcripts leading to false negative predictions (Wessels et al. 2019).

1 Despite their low sensitivity, methods like CLASH (Helwak et al. 2013) or miR-  
2 CLIP (Imig et al. 2015) have experimentally detected direct miRNA:target  
3 interactions and revealed that a sizable fraction of these interactions occurs at  
4 regions outside of the 3'UTRs or rely on noncanonical or mismatch containing  
5 seed sites (Helwak et al. 2013). High-throughput analysis of affinity binding also  
6 supports that some miRNAs can recognize their targets through noncanonical  
7 configurations (Becker et al. 2019; McGeary et al. 2019). The extent of  
8 noncanonical targeting cannot be assessed using most of the currently  
9 available computational prediction tools, further highlighting their limitations.

10 To overcome some of limitations of the current miRNA target prediction  
11 methods, we developed an approach that explores genetically driven changes  
12 in gene expression between human individuals. This approach allowed us to  
13 identify canonical and noncanonical targets that respond to physiological  
14 changes in miRNA levels.

15

16

## 1 RESULTS

2

### 3 Identification of miRNA targets in LCLs

4 To identify physiologically relevant miRNA-target interactions, we leveraged  
5 small RNA sequencing for a panel of 360 lymphoblastoid cell lines (LCLs),  
6 derived from healthy individuals of European descent with known genotype  
7 (Lappalainen et al. 2013; 1000 Genomes Project et al. 2015). For 62% (n=444)  
8 of all LCL expressed miRNAs, we identified at least one single nucleotide  
9 polymorphisms (SNPs) in the vicinity of their corresponding miRNA gene whose  
10 changes were significantly (FDR<0.05, Methods) associated with mature  
11 miRNA levels (Figure 1A, Supplementary S1A). We refer to these variants as  
12 miRNA quantitative trait loci (mirQTLs). We reasoned that targets of these  
13 miRNAs should be inversely associated with these mirQTLs *in trans* (Methods),  
14 consistent with miRNAs being negative regulators of gene expression. We used  
15 polyA-selected RNA-sequencing data in these cells and identified 6325 mRNAs  
16 (42.6% of the 14847 LCL-expressed genes) associated in *trans* in the inverse  
17 direction with at least one miRNA mirQTL (n=6430 joint eQTLs, Methods,  
18 Figure 1B,C, Supplementary S1B).

19 The association between a mirQTL and a mRNA can be a consequence of 1)  
20 the mRNA levels being regulated by the miRNA (causal model); 2) the miRNA  
21 and mRNA being independently associated with the same variant, for example  
22 if the same transcription factor regulates transcription of both the miRNA and  
23 mRNA (independent model); 3) the miRNA being regulated by the mRNA  
24 (reactive model); or 4) an undetermined mode of regulation (undecided model,  
25 Figure 1D)(Wang and Michael 2017). We used causal inference analysis to  
26 distinguish between these different possibilities for each joint eQTL-miRNA-  
27 mRNA trio. We found that with a false discovery rate of 10%, a tenth (10.3%,  
28 n=665) of all associations are mediated by changes in miRNA levels (Figure  
29 1E). In total, we identified around 4% of all LCL-expressed genes (593 out of  
30 14847) to be causal targets for 143 miRNAs. This corresponds to an average

1 of 5 targets per miRNA (median 2 targets, ranging between 1 and 44) (Figure  
 2 1F) and 1-2 miRNAs targeting each transcript (Figure 1G, Supplementary Table  
 3 ST1).

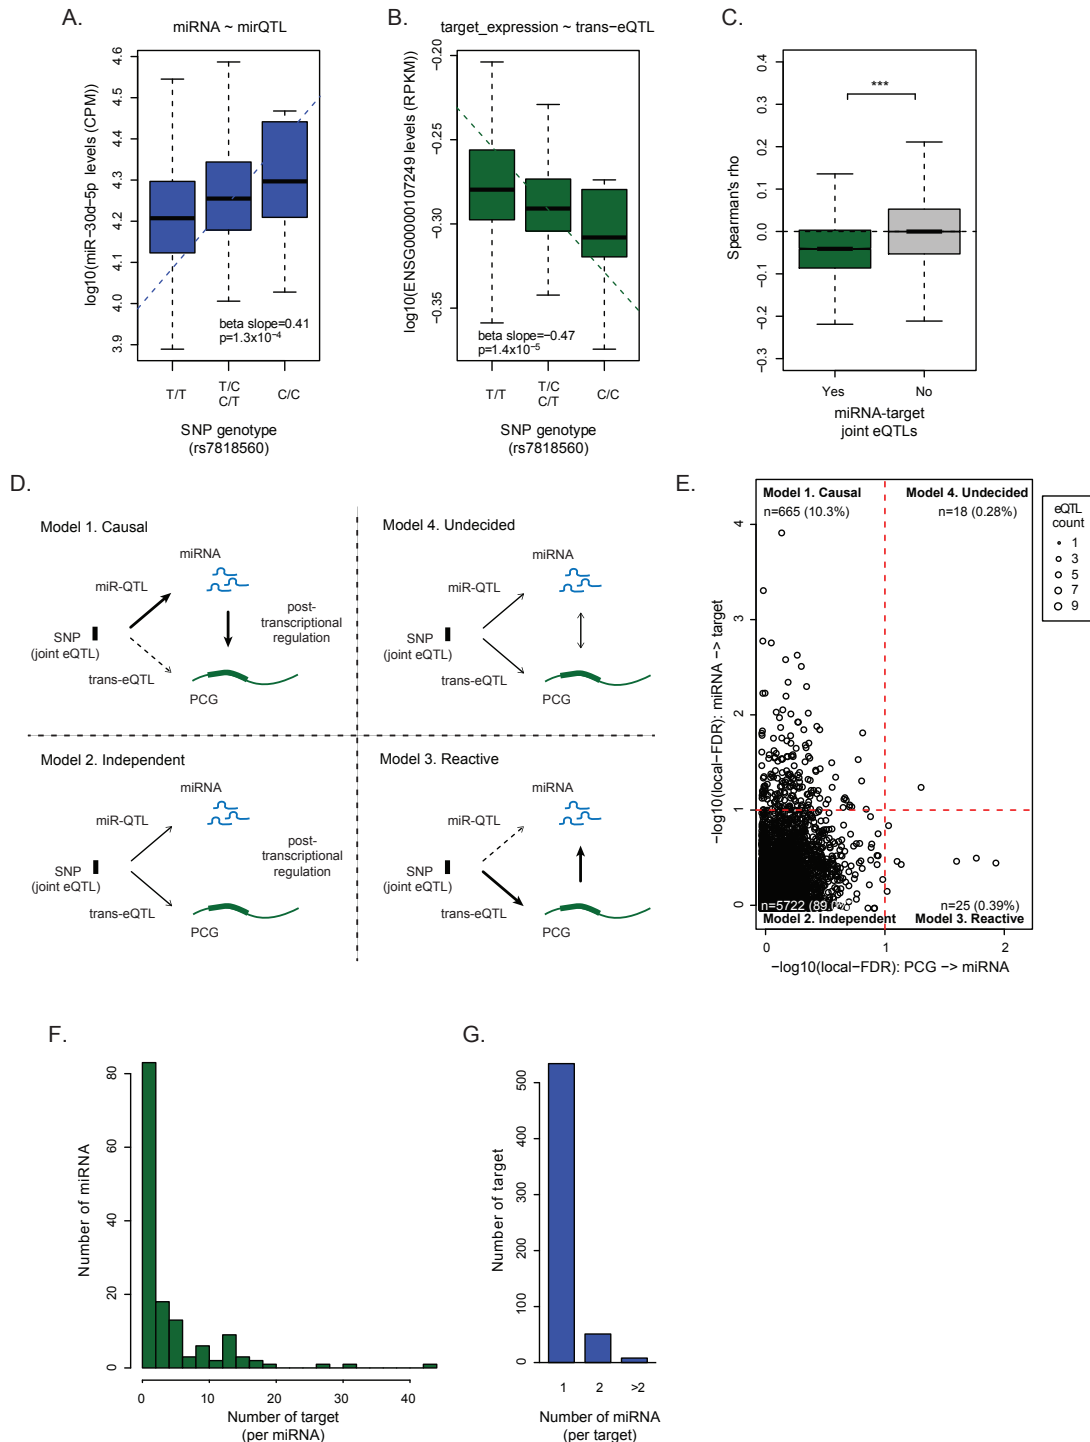

4

5 **Figure 1. GenVar approach detects physiologically relevant miRNA targets.** (A)  
 6 Distribution of miR-30d-5p expression (Y-axis, CPMs) in individuals with different  
 7 genotypes of the SNP variant (rs7818560, X-axis, miRQTL). (B) Distribution of GLIS3

1 (ENSG00000107249) expression (RPKM, Y-axis) in individuals with different  
2 genotypes of the SNP variant (rs7818560, X-axis, *trans*-eQTL). Beta slope and pvalue  
3 of eQTL associations are shown in the inset. (C) The distribution of co-expression  
4 (Spearman's correlation) between levels of miRNAs and genes that are jointly (green)  
5 or not jointly (grey) associated to the same SNP variant. Differences between groups  
6 were tested using a two-tailed Mann-Whitney *U* test. \*\*\*  $p < 0.001$ . (D) Schematic  
7 representation of the four models of causal inference testing that predict the  
8 relationship between joint eQTL variant (black box) associations with the miRNA levels  
9 (mirQTL) (blue) and target gene expression level (*trans*-eQTL) (green): (1) direct  
10 association between the variant and miRNA levels mediates the indirect association  
11 between that and target gene expression (causal model); (1) the variant is  
12 independently associated with miRNA and target levels (independent model); (3) direct  
13 association between the variant with target expression mediates the indirect  
14 association between that and miRNA levels (reactive model); and (4) the interaction  
15 between miRNA levels and target expression is complex (undecided model). Direct  
16 associations are depicted as solid lines and indirect associations as dash lines. (E)  
17 Scatterplot depicting causal inference testing local FDR associated with each the four  
18 models (as illustrated in D). The likelihood of target regulating miRNA levels is plotted  
19 on the x-axis and the likelihood of miRNA regulation target expression is plotted on the  
20 y-axis. Number and proportion of joint eQTLs are provided in brackets for each model.  
21 Dotted red lines denote significance threshold at local FDR  $< 0.1$ . Frequency  
22 distribution of the (F) number of predicted targets per miRNA and (G) number of  
23 targeting miRNAs per gene.

24

25 Given stronger mirQTL associations might bias towards detecting cases where  
26 miRNA levels causally mediate the association between the variant and target  
27 expression, we compared the overall strength of associations between  
28 mirQTLs and target *trans*-eQTLs and found no evidence that stronger mirQTLs  
29 would favour causal model predictions (Supplementary Figure S1C). Hereafter  
30 we refer to transcripts predicted to be targeted by miRNAs based on their  
31 genetic variations in humans as GenVar-targets.

32

### 33 **Limitations of GenVar-target identification approach**

34 It is well established that the power to detect quantitative trait loci for relatively  
35 lowly expressed genes is limited (GTEx Consortium et al. 2017). We assessed  
36 the extent by which this hampered our ability to use the GenVar approach to  
37 predict miRNA targets. miRNAs with predicted GenVar-targets (n=143) are  
38 among the most highly expressed in LCLs (n=716,  $p=9.4 \times 10^{-7}$ , two-tailed Mann-



1 Whitney U test, Figure 2A). Similarly, we found GenVar-targets are more highly  
 2 expressed than non-targets ( $p=6.57 \times 10^{-5}$ , two-tailed Mann-Whitney U test,  
 3 Figure 2B). These findings possibly reflect the approach's limitation to predict  
 4 lowly expressed miRNAs and target transcripts.

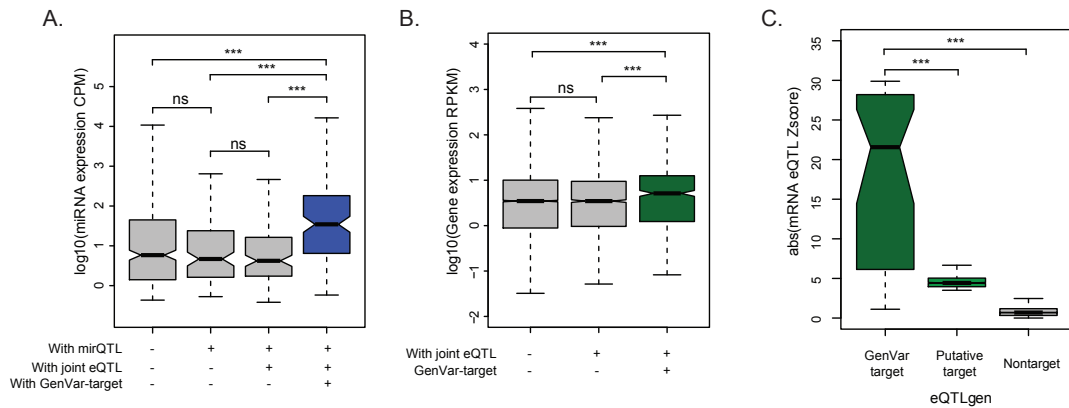

5

6 **Figure 2. Limitations of the GenVar approach.** (A) Distribution of subsets of LCL-  
 7 expressed miRNA levels with mirQTL associations, whose mirQTLs are jointly  
 8 associated with target expression (joint-eQTLs), and with predicted GenVar-targets  
 9 (blue). (B) Distribution of subsets LCL-expressed gene expression levels with those  
 10 that are jointly associated with a mirQTL (joint-eQTL), and those that are predicted  
 11 GenVar-targets (green). (C) In blood samples, distribution of *trans*-eQTL associations  
 12 (Zscore) between validated GenVar-targets (dark green), putative targets (light green)  
 13 or nontargets (grey) with mirQTLs. Differences between groups were tested using a  
 14 two-tailed Mann-Whitney U test. \*  $p < 0.05$ ; \*\*  $p < 0.01$ ; \*\*\*  $p < 0.001$ ; NS  $p > 0.05$ .

15

16 Cohort size is also a well-established contributor to the power of quantitative  
 17 trait analysis (Beavis 1998). To assess whether our predictions were limited by  
 18 this, we used a dataset that is almost 100 times larger (31,684 blood samples,  
 19 eQTLGen consortium (Vösa et al. 2018)) than the one used to identify GenVar-  
 20 targets (360 LCLs (Lappalainen et al. 2013)). As the expression levels for  
 21 mature miRNAs is unavailable for these blood samples and most blood  
 22 expressed miRNAs are also detected in LCLs (Juzenas et al. 2017), we  
 23 assumed mirQTLs are conserved between the two cohorts. We used publicly  
 24 available *trans*-eQTL data from eQTLGen to assess miRNA-target associations  
 25 in the blood samples. This data is available for a subset of human variants  
 26 (GWAS-associated SNPs,  $n=10,317$ ) and includes 101 miRQTL variants  
 27 associated for 23 miRNAs with at least one GenVar-targets in LCLs (total 137

1 targets). In eQTLgen blood samples, 66% of GenVar-targets (90/137) were also  
2 significantly associated in *trans* and in the same direction with their respective  
3 miRNA, supporting the interaction between them. This high replication rate  
4 support robustness of the association between miRNAs and GenVar-targets.  
5 Consistent with this, replicated *trans*-eQTL associations between GenVar-  
6 targets and mirQTLs in blood are significantly stronger compared to non-targets  
7 in LCLs ( $p < 2.2 \times 10^{-16}$ , two-tailed Mann-Whitney U test, Supplementary Figure  
8 S2A). Compared to replicated associations between mirQTLs and GenVar-  
9 targets, those only found in LCLs (34%) were similarly associated in blood  
10 ( $p = 0.335$ , two-tailed Mann-Whitney U test, Supplementary Figure S2A),  
11 suggesting some of these are likely explained by LCL-specific miRNA  
12 regulation.

13 In addition to the GenVar-targets we validated in blood (validated GenVar-  
14 targets), we found the expression levels of another 48 genes are also correlated  
15 in *trans* with mirQTLs for 9 of the 23 miRNAs (median 1 target per miRNA,  
16 ranging from 1 to 22). Moreover, we also detected 470 putative targets for 23  
17 miRNAs with no predicted GenVar-targets in LCLs (median 4 targets per  
18 miRNA, ranging from 1 to 53). We refer to these 518 genes as putative targets.  
19 However, despite their *trans*-association with mirQTLs, since miRNA levels are  
20 not available in eQTLgen, we could not infer the causal relationship between  
21 miRNAs and these putative targets. Given in LCLs, GenVar-targets only  
22 accounted for a tenth of all genes associated with mirQTLs (Causal model,  
23 Figure 1E), we predict only a small portion of these putative targets are  
24 regulated by miRNAs. This hypothesis is supported by the significantly stronger  
25 *trans*-associations, in blood, between mirQTLs and validated GenVar-targets  
26 compared to putative targets ( $p < 2.2 \times 10^{-16}$ , two-tailed Mann-Whitney U test,  
27 Figure 2C). Nevertheless, our findings suggest that the small LCL cohort size  
28 likely limited our power in comprehensively detecting all miRNA targets.

29

1 ***miRNA GenVar-targets are enriched in AGO-binding and experimentally***  
2 ***validated targets***

3 Using three widely-used miRNA prediction softwares: TargetScan (Agarwal et  
4 al. 2015), RNA22 (Miranda et al. 2006) and miRWalk (Sticht et al. 2018), we  
5 estimated between 88% and 93% of mRNAs to be targeted by at least 1 of the  
6 143 GenVar miRNAs (Supplementary Figure S3A). The proportion of genes  
7 (n=593) we predicted to be targeted by these miRNAs in LCLs is at least 20  
8 times smaller (Supplementary Figure S3A). The small number of miRNA targets  
9 might not be surprising given the low fraction of miRNA-target predictions  
10 common to all the 3 tools (11-21%, n=92812 out of 474,114, 825,295, 448,787  
11 total predictions from TargetScan, RNA22, and miRWalk, respectively,  
12 Supplementary Figure S3B) and the previously described high rate of false  
13 positives associated with the different prediction methods (Fridrich et al. 2019).

14 The extent of these differences and our approach's limitations probed us to  
15 investigate how different target prediction sets associate with properties of true  
16 miRNA targets. We found that the expression of GenVar-targets is more  
17 strongly inversely correlated with the levels of their targeting miRNAs compared  
18 to targets predicted by other computational tools in human LCLs (Figure 3A).

19 Using publicly available iCLIP data in LCLs (Wan et al. 2014), we determined  
20 the extent by which the transcripts predicted by the different approaches were  
21 bound by AGO2. To minimize the impact of unspecific AGO2 binding in these  
22 analyses, we only considered transcripts with experimental evidence of binding  
23 across at least two thirds (4 out of 6) of the sequenced LCL samples (Methods).  
24 We found that GenVar-targets are significantly more often bound by AGO2  
25 (26.6%) than genes predicted by the other 3 tools (<17.9%,  $p < 2.8 \times 10^{-7}$ , two-  
26 tailed Fisher's exact test, Figure 3B). AGO2-binding density is also significantly  
27 higher at GenVar-targets compared to other predicted targets ( $p < 0.02$ , two-  
28 tailed Mann-Whitney U test, Figure 3C), supporting the enrichment of GenVar-  
29 targets in miRISC binding and miRNA regulation.

30

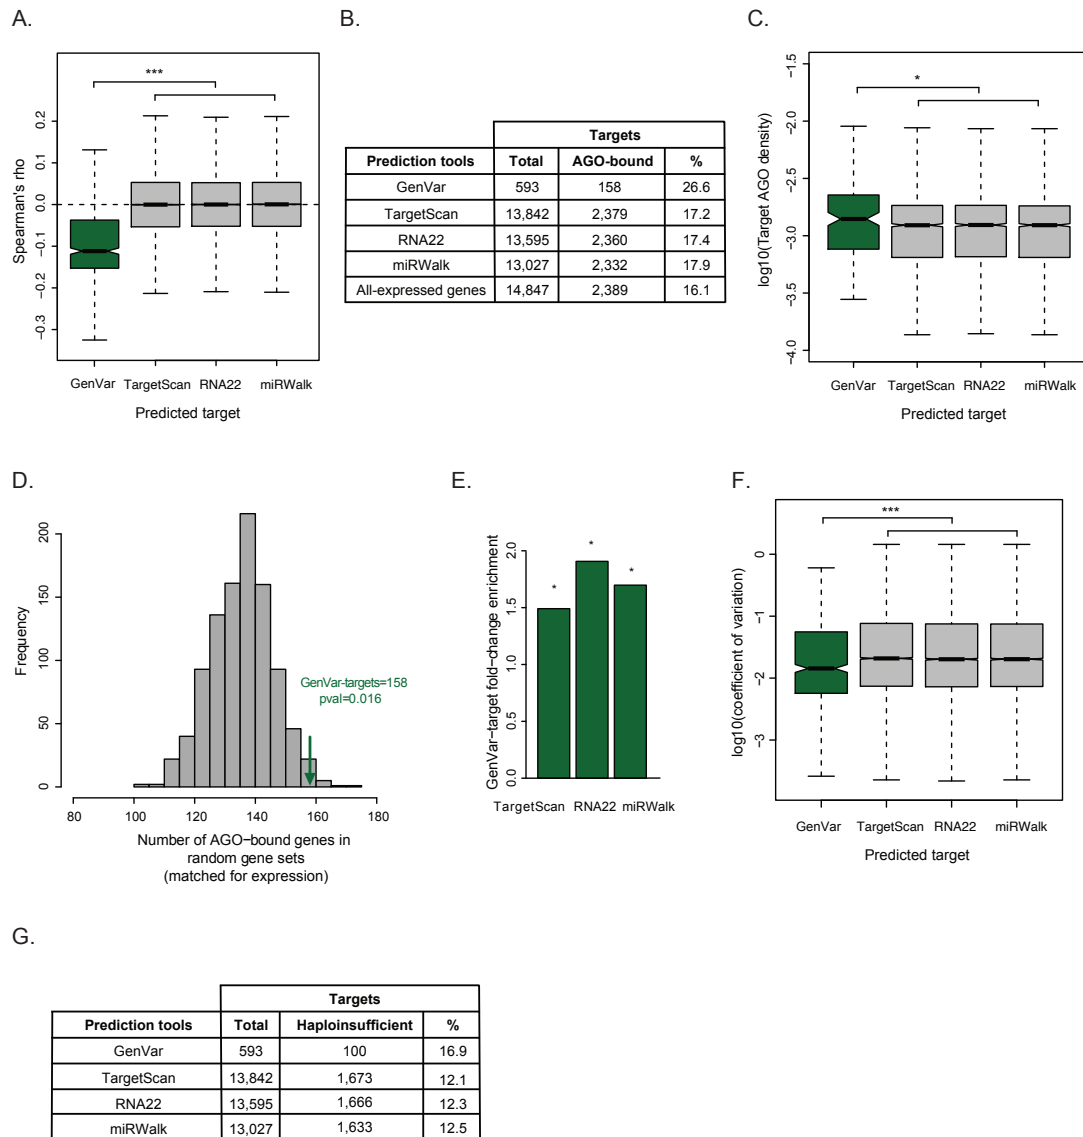

1

2 **Figure 3. GenVar targets are a reliable set of miRNA targets.** (A) Distribution of co-  
3 expression (Spearman's correlation) between miRNA levels and their GenVar-targets  
4 (green) or targets predicted by three other tools (TargetScan, RNA22, and miRWalk,  
5 grey). (B) Table of the number and proportion of GenVar-targets or targets predicted  
6 by other tools to be bound by AGO2. (C) Distribution AGO2 binding density (length of  
7 AGO2 binding site/target 3' UTR length) of GenVar-targets (green) and targets  
8 predicted by other tools. (D) Distribution of the number of AGO2-bound genes within  
9 1000 sets of randomly sampled genes from other predicted targets with matching  
10 expression levels and 3' UTR length as GenVar-targets. Green arrow represent the  
11 number of AGO2-bound GenVar-targets. (E) Of all predictions by each of the three  
12 prediction tools, the enrichment in the proportion of experimentally validated (using  
13 direct Luciferase assays) GenVar-target predictions over nonGenVar-target  
14 predictions. (F) Distribution of the coefficient of variation (CV) in expression levels of  
15 GenVar-targets (green) and targets predicted by other tools (grey). (G) Table of the  
16 number and proportion of target predictions that are annotated as haplo-insufficient.  
17 Differences between groups were tested using a two-tailed Mann-Whitney *U* or two-  
18 tailed Fisher's exact test. \*  $p < 0.05$ ; \*\*  $p < 0.01$ ; \*\*\*  $p < 0.001$ ; NS  $p > 0.05$ .

1 As expected, transcripts with detectable AGO2 binding in iCLIP data are in  
2 general more highly expressed ( $p < 2.4 \times 10^{-10}$ , two-tailed Mann-Whitney U test,  
3 Supplementary Figure S4A), reflecting the technical limitations of the  
4 technology (Wessels et al. 2019). More than 75% ( $n=447/593$ ) of GenVar-  
5 targets are less abundant than the median expression level of transcripts with  
6 experimental evidence of AGO2-binding ( $n=1101/14847$ , Supplementary  
7 Figure S4B), suggesting that AGO2-binding at many GenVar-targets may have  
8 escaped detection due to their relatively low expression. To account for this  
9 bias, we compared the extent of AGO2 binding at GenVar-targets relative to  
10 randomly sampled expression-matched genes predicted by the other 3 tools  
11 and we found that GenVar-targets are significantly more often bound by AGO2  
12 than their counterparts from other prediction methods (1.17-1.19 fold  
13 enrichment,  $p < 0.024$ , permutation test, Figure 3D, Supplementary Figure S4C-  
14 F).

15 We tested the proportion of GenVar-targets that have been experimentally  
16 validated. Given the known ascertainment bias to experimentally validate  
17 previously computationally predicted miRNA targets, we compared the  
18 proportion of experimentally validated predictions by each of the three tools  
19 which are also detected using the GenVar approach to those not predicted by  
20 GenVar. We found a significantly higher fraction of GenVar-targets ( $p < 0.05$ ,  
21 two-tailed Fisher's exact test) has been experimentally validated using direct  
22 luciferase assays (1.5-1.9 fold-enrichment, Figure 3E, Supplementary Figure  
23 S4G) and in all catalogued experiments (1.4-1.7 fold-enrichment,  
24 Supplementary Figure S4H,I) relative to targets predicted by other tools  
25 (Karagkouni et al. 2018), further corroborating that our approach enriches for  
26 real miRNA targets.

27 miRNA-mediated repression on most genes is frequently lower than the inter-  
28 individual variability in their expression levels (Pinzon et al. 2017). This  
29 observation led to the proposal that only the levels of genes whose expression  
30 is under tight control, such as haplo-insufficient genes, can be effectively

1 regulated by miRNAs. Consistent with this, we found that the variation in  
2 GenVar-target expression across individuals in the human population are  
3 significantly lower compared to target predicted made by other tools ( $p < 9.6 \times 10^{-5}$ ,  
4 two-tailed, Mann-Whitney U test, Figure 3F). We also found that GenVar-  
5 targets are enriched in haplo-insufficient genes ( $p < 3.0 \times 10^{-3}$ , two-tailed Fisher's  
6 exact test, Figure 3G), supporting the notion that miRNA-mediated  
7 phenotypical changes are likely due to their ability to regulate a relatively small  
8 set of dose-sensitive genes (Pinzon et al. 2017; Seitz 2017).

9

### 10 ***Cancer-disrupted miRNA abundance is associated with causal target*** 11 ***expression changes***

12 Given the limitations in iCLIP technique and the ascertainment bias in reporting  
13 of miRNA validation experiments, we sought an alternative unbiased approach  
14 to assess the reliability of GenVar-target predictions. We took advantage of  
15 extensive genotyping and transcriptomic data from blood-derived cancer  
16 samples to assess the impact of changes in miRNA expression on GenVar-  
17 target levels. Specifically, we identified individuals that carry copy number  
18 variants (CNVs) that overlap primary miRNA loci in Lymphoid Neoplasm Diffuse  
19 Large B-cell Lymphoma (DLBC, Figure 4A)(Cancer Genome Atlas Research et  
20 al. 2013). These CNVs resulted in homozygous loss or multiple amplifications  
21 of 35 miRNAs (48 samples in total, median 1 samples per CNV, Supplementary  
22 Table ST2).

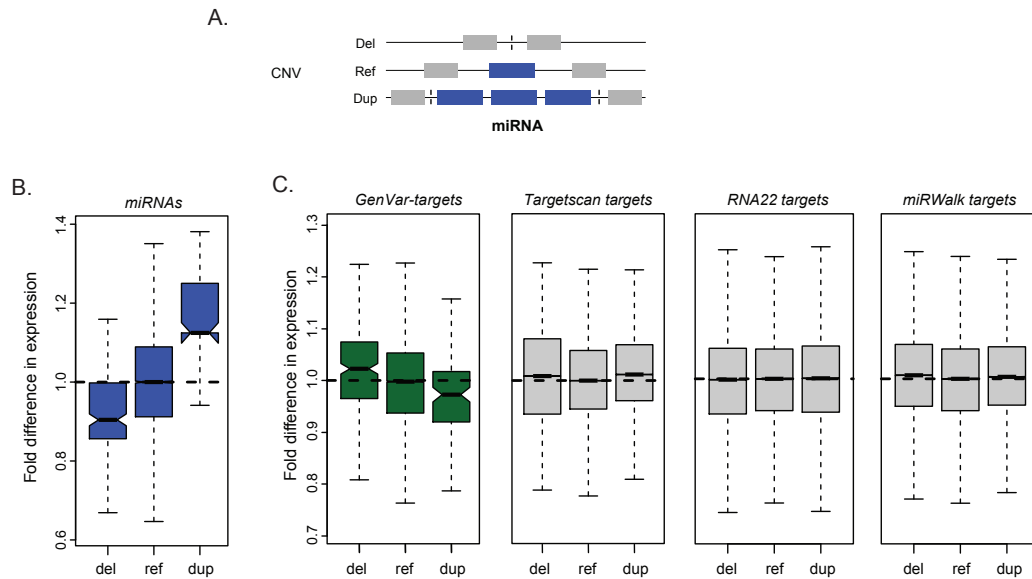

1

2 **Figure 4. GenVar-target levels are impacted by change in miRNA copy number.**

3 (A) Copy number variations in DBLC cancer samples can result in duplications or  
 4 deletions of primary miRNA loci. (B) Distribution of the fold difference in miRNA levels  
 5 (CPM, blue), relative to the median of diploid samples, of individuals that carry  
 6 homozygous deletions, diploid genotype, or multiple duplications at primary miRNA  
 7 loci. (C) Distribution of fold difference in gene expression levels (RPKM) of GenVar-  
 8 targets (green) or targets predicted by other tools (grey), relative to the median of  
 9 diploid samples, between individuals that carry homozygous deletions, diploid  
 10 genotype, or multiple duplications at their targeting miRNAs. Differences between  
 11 groups were tested using a two-tailed Mann-Whitney *U* test. \*  $p < 0.05$ ; \*\*  $p < 0.01$ ;  
 12 \*\*\*  $p < 0.001$ ; NS  $p > 0.05$ .

13

14 Mature miRNA expression levels corroborated that, as expected, these CNVs  
 15 led to decreased or increased miRNA expression by at least 9 and 12%,  
 16 respectively (Figure 4B) relative to individuals that are diploid for the miRNA  
 17 gene. The relative small impact of copy number changes on miRNA expression  
 18 are likely a consequence of samples containing mixed normal and tumor cells  
 19 (Cancer Genome Atlas Research et al. 2013). Changes in miRNA abundance  
 20 were significantly negatively associated with expression levels of predicted  
 21 GenVar-targets ( $p < 0.05$ , two-tailed Mann-Whitney *U* test) but not with the levels  
 22 of targets predicted by other tools (Figure 4B,C), substantiating direct miRNA  
 23 post-transcriptional regulation of GenVar-targets.

24 In summary, our results support that GenVar-targets are enriched 1) for

1 AGO2-binding, 2) for experimentally validated miRNA-target interactions, and  
2 3) are inversely impacted by changes in disrupted miRNA levels in cancer  
3 samples. These observations support that GenVar-targets represent a reliable  
4 catalogue of biologically relevant miRNA targets.

5

### 6 ***miRNA targeting is enriched in canonical binding at 3'UTRs***

7 Given that our approach does not rely on the identification of perfectly  
8 complementary regions to the miRNA seed within transcripts, we next sought  
9 to estimate the extent of canonical and noncanonical miRNA targeting (Hausser  
10 and Zavolan 2014). Consistent with previous reports (Lewis et al. 2005), we  
11 found the majority of GenVar-targets (404 out of 593, 68.1%) harbour perfect  
12 seed matches for their targeting miRNAs at their 3' UTRs (canonical  
13 targets)(Figure 5A). This proportion is significantly higher than randomly  
14 sampled genes with matching expression level and 3' UTR length ( $p=0.001$ ,  
15 permutation test, Supplementary Figure S5A). Compared to other predicted  
16 targets that also contain complementary seed regions, alignment profiles of  
17 canonical miRNA GenVar-target interactions showed these transcripts bear  
18 longer sequence complementary binding sites to miRNA seed region ( $p=0.039$ ,  
19 two-tailed Mann Whitney test, Supplementary Figure S5B,C). This is consistent  
20 with significantly higher number of 8-mer and 7-mer binding sites found within  
21 GenVar-targets (52.5% 6-mer, 30.2% 7-mer, and 17.3% 8-mer) compared to  
22 other predicted targets ( $p<4.3\times 10^{-3}$ , two-tailed Fisher's exact test,  
23 Supplementary Figure S5D).

24 In addition, some miRNAs have also been found to interact with regions in their  
25 target's 5' UTRs or coding sequences (CDSs) (Chi et al. 2009; Helwak et al.  
26 2013). Of the 31.9% of GenVar-targets ( $n=189$ ) with no canonical miRNA  
27 binding sites in their 3' UTR targets, seed-matching sites were found at their 5'  
28 UTR and CDS for 9.0% ( $n=17$ ) and 31.2% ( $n=59$ ), respectively. Unlike  
29 canonical GenVar-targets (Supplementary Figure S5A), these proportions are  
30 not significantly different from randomly sampled genes with matching



1 expression level and length of 5' UTR or CDS ( $p>0.09$ , permutation test,  
2 Supplementary Figure S5E,F). Our findings are in line with the current  
3 understanding that miRNA targeting at 3' UTR is more likely to lead to  
4 physiological changes in target abundance (Gu et al. 2009).

5

### 6 ***Noncanonical targets bear extensive complementarity to miRNA 3' end***

7 Apart from perfect matches to the miRNA seed region that form canonical  
8 miRNA binding sites, sequence complementarity sites outside the seed region  
9 have also been shown to contribute to guiding miRNA target interactions  
10 (Becker et al. 2019; McGeary et al. 2019). To investigate binding architecture  
11 that underlie noncanonical miRNA targeting, we focused on the 31.9% of  
12 GenVar-targets that lack seed matching miRNA binding sites at 3' UTRs (Figure  
13 5A, Supplementary Table ST3). In LCLs, the correlation between miRNAs and  
14 their canonical or noncanonical targets is statistically indistinguishable ( $p=0.81$ ,  
15 two-tailed Mann-Whitney U test, Figure 5B). Similar impact on canonical and  
16 noncanonical GenVar-target expression was also observed as a result of  
17 disrupted miRNA levels by CNVs in blood cancer samples ( $p>0.29$ , two-tailed  
18 Mann-Whitney U test, CNVs disrupted the levels of 34 and 21 miRNA canonical  
19 and noncanonical GenVar-targets, respectively, Supplementary Figure S6).  
20 These findings support that other features may contribute to determining  
21 miRNA-mediated regulation for some miRNAs. Compared to randomly  
22 sampled genes with matching expression level and length, noncanonical  
23 GenVar-targets were not enriched to contain seed-matching MREs at 5' UTR  
24 or CDS ( $p>0.05$ , permutation test, Supplementary Figure S7A,B).

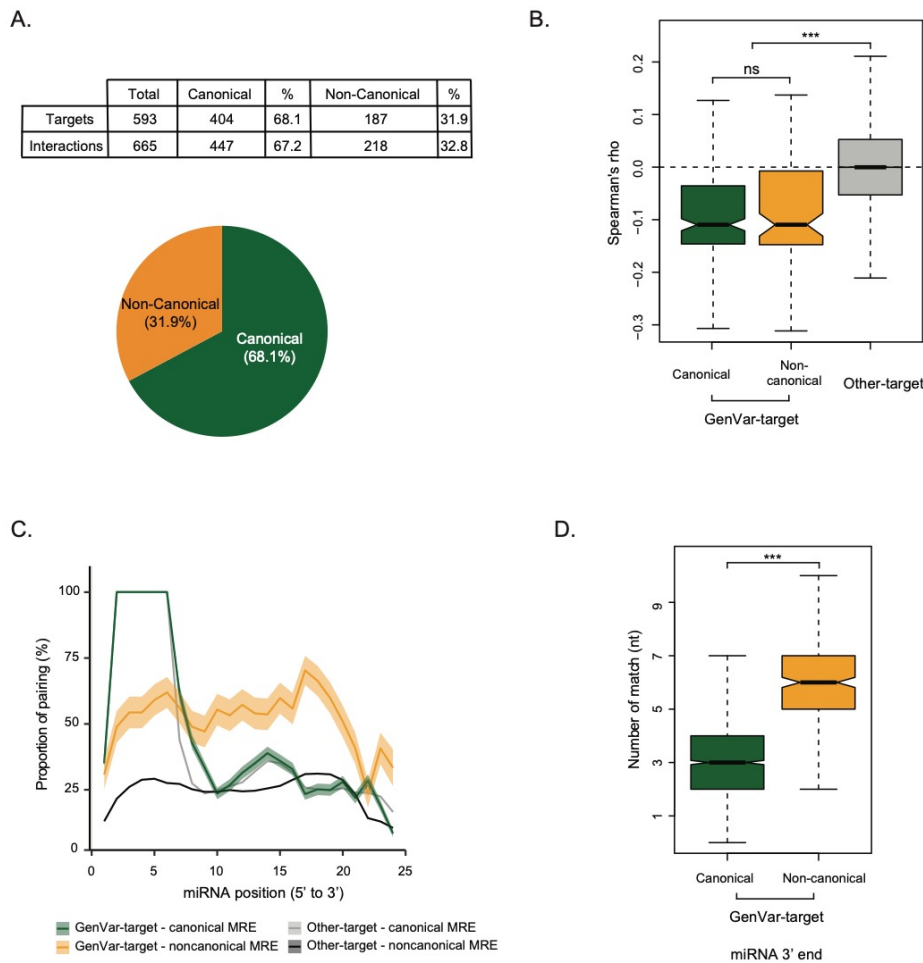

1

2 **Figure 5. A sizeable fraction of GenVar-targets is noncanonical.** (A) Table (Upper  
3 panel) and pie chart (lower panel) illustrating the number and proportion of canonical  
4 and noncanonical GenVar-targets. (B) Distribution of co-expression (Spearman's  
5 correlation) between miRNA levels and their canonical (green) and noncanonical  
6 (yellow) GenVar-targets, as well as targets predicted by other tools (grey). (C) Binding  
7 profile illustrating the average fraction of complementary sequence alignment between  
8 target and miRNA at each nucleotide position across the mature miRNA (5' to 3')  
9 for canonical and noncanonical GenVar-targets (green and yellow, respectively), as  
10 well as targets predicted other tools that contain canonical and noncanonical binding  
11 sites (light and dark grey, respectively). (D) Distribution of the number of complementary  
12 sequence alignments (nt) between canonical (green) or noncanonical (yellow)  
13 GenVar-targets with 3' end of miRNAs. Differences between groups were tested using  
14 a two-tailed Mann-Whitney *U* test. \*  $p < 0.05$ ; \*\*  $p < 0.01$ ; \*\*\*  $p < 0.001$ ; NS  $p > 0.05$ .

15

16 We assessed the alignment between noncanonical GenVar-targets and their  
17 associated miRNAs. Using adequate alignments between 68% of target 3' UTR  
18 and their respective miRNAs, we found each miRNA have on average between  
19 2-3 noncanonical targets (ranging from 1 to 20, Supplementary Figure S7C). Of

1 all miRNAs with GenVar-targets, 43.3% regulate gene expression only through  
2 the canonical mode of binding, whereas 20.3% have only noncanonical targets,  
3 and 36.4% have a mixture of both (Supplementary Figure S7D). Alignment  
4 profiles of noncanonical miRNA GenVar-target interactions showed that, as  
5 expected, complementarity to miRNA seed regions is significantly less frequent  
6 than that found for canonical targets ( $p < 2.2 \times 10^{-16}$ , two-tailed Mann Whitney test,  
7 Figure 5C, Supplementary Figure S7E). In contrast, extensive nucleotide  
8 complementarity was observed between noncanonical targets and 3' end of  
9 miRNA ( $p < 2.2 \times 10^{-16}$ , two-tailed Mann-Whitney test, Figure 5C,D), suggesting  
10 imperfect seed interaction may be compensated by additional binding outside  
11 of miRNA seed region.

12

## 1 **DISCUSSION**

2 Target identification remains one of the biggest challenges when trying to  
3 understand the contribution of miRNAs to post-transcriptional regulation of  
4 gene expression.

5 Here we propose a target prediction method that leverages genetically driven  
6 changes in miRNA and transcript expression levels within humans to identify  
7 miRNA targets (GenVar-targets). Compared to targets predicted by other  
8 approaches, GenVar-targets are enriched in AGO2 binding, supporting their  
9 frequent association with the miRISC. As expected, given their established role  
10 in post-transcriptional repression, miRNA copy number changes in cancer, are  
11 inversely correlated with GenVar-target expression. This is in contrast to what  
12 we observe for miRNA targets predicted using other approaches, whose  
13 expression remain unchanged. Finally, a sizable fraction of GenVar-targets are  
14 validated in an independent dataset. These observations support the  
15 physiological relevance of our miRNA target predictions and the high specificity,  
16 especially relative to available alternatives, of the GenVar approach.

17 GenVar-targets account for 4% of mRNAs expressed in lymphoblastoid cell  
18 lines (LCLs). The proportion of transcripts we predict to respond to physiological  
19 changes in miRNA levels is significantly smaller than what is estimated by other  
20 tools. This discrepancy between ours and other estimates is in part explained  
21 by the relatively high rate of false positive predictions of other methods [(Fridrich  
22 et al. 2019) and supported by our own analysis]. We also analyzed how different  
23 factors, including the expression levels of miRNAs, mRNAs and size of the  
24 human cohort, impact the sensitivity of the GenVar approach and likely increase  
25 false negative predictions. We found that, as expected, miRNA target  
26 associations are significantly stronger in larger cohorts. The large cohort size  
27 also allowed us to identify an additional set of putative targets not detected  
28 using the smaller set of LCL samples. We therefore anticipate that the ongoing  
29 trend to expand population cohort size will result in increased prediction

1 sensitivity and has the potential to extend the repertoire of physiologically  
2 relevant miRNA targets.

3 In summary, our analysis supports the functional relevance of GenVar-targets  
4 with relatively low false positive predictions. High specificity of GenVar  
5 predictions is accompanied by decreased sensitivity that we anticipate can be  
6 minimized with increased cohort size. Furthermore, given most miRNAs are  
7 tissue specifically expressed, GenVar-targets identified in LCLs are therefore  
8 most likely relevant for this and closely related cells/tissues. The application of  
9 this approach to other cells or tissues has the potential to uncover the miRNA  
10 targetome in different tissues and to reveal potential tissue-specific features of  
11 miRNA targeting.

12 We further investigated the miRNA target binding architecture of GenVar  
13 predictions. Specifically and given that the GenVar approach does not require  
14 prior knowledge of miRNAs binding features, it provides an unbiased target set  
15 to investigate the extent of noncanonical targeting by miRNAs. Consistent with  
16 previous studies (Chi et al. 2009; Hafner et al. 2010; Helwak et al. 2013), we  
17 found a sizable fraction (around 32%) of miRNA targets are noncanonical. The  
18 impact of miRNA on target expression is independent of binding architecture  
19 since variation in miRNA levels was similarly associated with changes in the  
20 expression of their canonical or noncanonical targets. Our observations are in  
21 line with recent high-throughput binding affinity experiments (Becker et al. 2019;  
22 McGeary et al. 2019) and earlier studies (Vella et al. 2004; Didiano and Hobert  
23 2006), and support the functional relevance of noncanonical targeting by  
24 miRNAs and the diversity of their binding architecture.

25 This mode of targeting, which we predict accounts for around a third of miRNA  
26 target interactions, is missed by most prediction methods and thus remains  
27 poorly understood. Specifically, we found that most noncanonical targets sites  
28 that lack perfect seed matches contained additional sequence complementarity  
29 with 3' ends of the miRNA, suggesting mismatches between target and miRNA  
30 seed regions can be compensated by additional matches outside the seed.

1 The availability of this high confidence set of transcripts regulated by miRNAs  
2 opens avenue to study the role of additional molecular entities in miRNA  
3 regulation.

4

## 1 MATERIAL AND METHODS

2

### 3 ***Mapping of molecular quantitative trait loci (QTLs)***

4 We used miRNA abundance and processed genotype for human EBV-  
5 transformed lymphoblastoid cell lines (LCLs) derived from 360 healthy  
6 individuals of European descent (CEU, GBR, FIN and TSI) (downloaded from  
7 EBI ArrayExpress, accession E-GEUV-1)(Lappalainen et al. 2013). We tested  
8 the association between single nucleotide polymorphisms (SNPs) located  
9 within the 1Mb of primary miRNA transcript loci for each of the 715 miRNAs  
10 expressed in LCLs with available expression data (Lappalainen et al. 2013).  
11 Only SNPs with minor allele frequency (MAF) greater than 5% were considered  
12 in the QTL analyses. miRNA eQTL associations were estimated using FastQTL  
13 (version 2.184) (Ongen et al. 2016). To assess the significance of the  
14 correlations globally, we first applied multiple testing correction on FastQTL  
15 estimated associations by permuting the expression levels of each miRNA 1000  
16 times and noted the maximum permuted absolute regression coefficient ( $r_{\max}$ ).  
17 We considered only miRNA eQTLs with an observed absolute regression  
18 coefficient ( $r_{\text{obs}}$ ) greater than 95% of all permuted  $r_{\max}$  values to be significant  
19 (Lappalainen et al. 2013). We further performed Benjamini-Hochberg multiple  
20 testing correction to estimate FDR (<5%) for all SNPs within the 1Mb vicinity of  
21 pri-miRNAs. We identified significant miRNA-eQTLs (mirQTLs) for 62% (n=444)  
22 of LCL-expressed miRNAs.

23 The expression levels (RPKM) of protein-coding genes (n=14,847) in the same  
24 360 LCL samples were downloaded from a previous study (as described in (Tan  
25 et al. 2017)). We identified *trans*-eQTLs between all expressed genes and  
26 mirQTLs using the same approach as described above with the exception that  
27 multiple-testing correction was applied for all *trans*-eQTL tested. Genes in the  
28 vicinity (within 1Mb) of pri-miRNAs were not considered in the analysis. Of the  
29 14,847 protein-coding genes expressed in LCLs, we found 6325 genes (42.6%)

1 to be associated in *trans* and in the inverse direction with mirQTLs for 444  
2 miRNA (6430 joint eQTLs).

### 3 ***Causality inference between miRNA abundance and target protein-coding*** 4 ***gene expression***

5 To infer the causal relationship between miRNA levels and putative target gene  
6 expression, we considered joint-eQTLs that are associated with both miRNA  
7 levels (mirQTL) and their putative target gene abundance (*trans*-eQTL) (6430  
8 joint eQTLs associated with 444 miRNAs and 6325 protein-coding genes). For  
9 all such triplets of joint-eQTL – miRNA – target gene expression, we performed  
10 causal inference testing using a Bayesian approach as implemented by Findr  
11 (Wang and Michoel 2017) by testing the models: (1) the causal model with  
12 miRNA where regulates gene expression; (2) the independent model where  
13 joint-eQTL variants are independently associated with miRNA levels and gene  
14 expression; (3) the reactive model where gene expression mediates miRNA  
15 abundance; and (4) the undecided model where causative relationship between  
16 miRNA and gene is more complex (Wang and Michoel 2017). Findr was run  
17 using the recommended test (`findr.pijs_gassist`) with default parameters as  
18 described in (Wang and Michoel 2017) and significant associations (FDR<10%)  
19 were considered in the analysis.

### 20 ***Assessing sensitivity and replication rate of the GenVar approach***

21 To assess sensitivity of the GenVar approach, we estimated the number of  
22 GenVar-targets undetected using LCL samples (n=360,  
23 Geuvadis)(Lappalainen et al. 2013) in a considerably larger cohort of blood  
24 samples (n=31,684 (Võsa et al. 2018)). Given mature miRNA levels are not  
25 available in the blood samples, for LCL-identified mirQTL with *trans*-eQTL data  
26 available in blood (64 miRNA, 101 mirQTLs), we considered *trans*-eQTL  
27 associations between all protein-coding genes and these mirQTL to identify  
28 additional miRNA targets that are missed in LCLs in blood. We applied multiple  
29 testing correction (Benjamini-Hochberg) for the number of *trans*-eQTL variants



1 tested and identified additional miRNA GenVar-targets as those with FDR<5%  
2 and are undetected in LCLs.

3 Robustness of *trans*-eQTL associations identified in LCLs was also assessed  
4 in the large cohort of blood samples (Võsa et al. 2018). We considered all *trans*-  
5 eQTL associations between GenVar-targets and mirQTLs tested in blood  
6 (association data is available in blood for 23 mirQTL variants for 39 miRNAs  
7 with GenVar-targets identified in LCLs). For these *trans*-eQTLs, we applied  
8 multiple testing correction (Benjamini-Hochberg adjusted p-value <5%) for the  
9 number of variants tested. We considered associations found in the same  
10 direction in eQTLgen blood samples as that found in Geuvadis LCLs to be  
11 replicated.

### 12 ***Comparison with existing miRNA target prediction tools***

13 We downloaded predictions from TargetScan (version 7) (Agarwal et al. 2015),  
14 RNA22 (version 2) (Miranda et al. 2006), miRWalk (version 3) (Sticht et al. 2018)  
15 and filtered for miRNAs and protein-coding genes expressed in LCLs.

### 16 ***Enrichment in AGO2 binding***

17 We assessed the interaction of GenVar-targets with the miRISC complex using  
18 publicly available iCLIP data to identify regions bound by AGO (Wan et al. 2014)  
19 (GSE50676). AGO-bound transcripts were downloaded from GSE50676. We  
20 only considered AGO binding sites consistently detected in at least two thirds  
21 of all replicates (4 out of 6 samples). In total, out of all LCL-expressed genes  
22 considered in our analysis (n=14,847), 18% (n=2,669) were considered to be  
23 robustly bound by AGO.

24 To account for differences in expression levels, LCL-expressed genes  
25 predicted as miRNA targets by other tools were divided into two sets of 4  
26 equally sized bins based on their expression levels. For each GenVar-target, a  
27 gene is randomly selected without replacement from their expression-match  
28 gene bins.

## 1 ***Overlap with experimental validated targets***

2 We used a database containing experimentally validated miRNA target  
3 interactions (DIANA-TarBase v8) (Karagkouni et al. 2018) to evaluate the  
4 proportion of validated GenVar-targets. We filtered for interactions between  
5 LCL-expressed miRNAs and target genes and we considered only interactions  
6 validated using all validation experiments (n=386,278 interactions) or direct  
7 luciferase assays (n=190,334 interactions). To avoid ascertainment bias  
8 towards enriched experimental validation of previously computationally  
9 predicted targets, when assessing the experimentally validated fraction of  
10 GenVar-targets, we considered GenVar-targets that overlapped predictions  
11 from other tools and compared these to predictions from other tools that were  
12 not detected by GenVar. 463, 171 and 219 GenVar-targets were also predicted  
13 by TargetScan, RNA22, and miRWalk, respectively. Most predictions from  
14 other tools were not predicted by GenVar as targets (474,069, 825,124 and  
15 448,568 for TargetScan, RNA22, and miRWalk, respectively).

## 16 ***Overlap with haplo-insufficient genes***

17 Haplo-insufficient genes were downloaded from the DECIPHER database  
18 (v10)(Firth et al. 2009) and from (Dang et al. 2008). We merged annotations  
19 from the two studies. In total, 1754 LCL-expressed genes were found to be  
20 haplo-insufficient (1577 from DECIPHER and 288 from Dang et al. 2008).

## 21 ***Impact of genetic variation at miRNA loci on GenVar-target expression***

22 We considered all copy number variations (CNVs) that overlap primary miRNA  
23 transcript loci from blood-derived cancer samples (Lymphoid Neoplasm Diffuse  
24 Large B-cell Lymphoma, DLBC) with available genotyping and transcriptomic  
25 data (Cancer Genome Atlas Research et al. 2013). We identified CNVs within  
26 48 individuals that led to homozygous loss or multiple amplifications of 35  
27 miRNAs predicted to have at least one GenVar-target (each deep gain or loss  
28 event is found in a median of 1/48 samples). CNV data was downloaded from  
29 the TCGA Pan-Cancer cohort on the Xena Functional Genomics Explorer

1 (Goldman et al. 2019). For miRNAs disrupted by CNV, we plotted the average  
2 distribution of the fold difference in miRNA levels and their respective target  
3 gene expression for each DLBC sample, relative to the median expression of  
4 individuals that are diploid for the miRNA gene.

### 5 ***Identification of noncanonical miRNA targets***

6 We considered all GenVar-targets with seed-matching (including all 8mer, 7mer  
7 and 6mer sites) miRNA recognition elements (MREs) at their 3' UTR, as  
8 predicted by the standalone version of TargetScan (version 7) (Agarwal et al.  
9 2015), as canonical targets. Comparisons of seed-matching MREs were made  
10 to other canonical MRE-containing targets predicted by TargetScan. Seed-  
11 matching MREs located at transcript 5' UTR and CDS were predicted using the  
12 standalone version of TargetScan (version 7) (Agarwal et al. 2015). Ensembl  
13 annotated transcript sequences were used in the analysis (version 98). We  
14 tested the enrichment of MRE frequency found at 5' UTR/CDS/3' UTR against  
15 that found at 1000 sets of randomly sampled LCL-expressed genes with  
16 matching expression level and respective transcript segment length. LCL-  
17 expressed genes were divided into two sets of 4 equally sized bins based on  
18 their expression levels or length (5' UTR, CDS, or 3' UTR), independently. For  
19 each canonical GenVar-target, a gene is randomly selected without  
20 replacement from the intersection of their expression-match and length-match  
21 gene bins.

22 For noncanonical GenVar-targets, we predicted miRNA binding sites by  
23 aligning the full sequence of their targeting mature miRNA with the 3' UTR of  
24 target genes using RNA duplex using default parameters with added  
25 parameters allowing all alignments within 5kcal/mol of the optimal structure to  
26 be considered for downstream filtering and GU pairs not considered in the  
27 analysis (RNA duplex -e 5 --noGU) (ViennaRNA Package 2.0 (Lorenz et al.  
28 2011)). Alignments that contained consecutive gaps in miRNA sequence or  
29 multiple gap openings in target sequence were discarded given the miRISC is  
30 unlikely to bind to targets that would result in consecutive bulges in binding

1 (Brennecke et al. 2005). No restriction was set on the number of mismatches  
2 in alignment.

### 3 ***Statistical tests***

4 All statistical analyses were performed using the R software environment for  
5 statistical computing and graphics (R Development Core Team 2008). When  
6 multiple comparisons were made, we reported the highest p-value of all  
7 comparisons.

### 8 ***Data Access***

9 Analyses were performed using publicly available command-line tools.  
10 Versions and deviations from parameters used are as detailed in the Methods.  
11 All scripts used to parse the results are available upon request.

12

### 13 ***Competing interests***

14 The authors declare that they have no competing interests.

### 15 ***Acknowledgements***

16 We thank members of the Marques group for valuable comments and  
17 discussion. We thank Zoltán Kutalik and Olivier Delanau for discussion on  
18 population genomics analysis. We thank Constance Ciaudo for discussion on  
19 miRNA target validation. This work is funded by the Swiss National Science  
20 Foundation grant (PP00P3\_179065 to ACM).

### 21 ***Authors' contributions***

22 JYT, BA and ACM designed the study. JYT and BA performed the experiments  
23 and analyzed the results. JYT, BA and ACM discussed the results. ACM  
24 supervised the study. JYT and ACM wrote the manuscript. All authors approved  
25 the manuscript.

1

2

## 1 REFERENCES

2

- 3 1000 Genomes Project C, Auton A, Brooks LD, Durbin RM, Garrison EP, Kang HM,  
4 Korbel JO, Marchini JL, McCarthy S, McVean GA et al. 2015. A global  
5 reference for human genetic variation. *Nature* **526**: 68-74.
- 6 Agarwal V, Bell GW, Nam JW, Bartel DP. 2015. Predicting effective microRNA target  
7 sites in mammalian mRNAs. *Elife* **4**.
- 8 Alisch RS, Jin P, Epstein M, Casparly T, Warren ST. 2007. Argonaute2 is essential for  
9 mammalian gastrulation and proper mesoderm formation. *PLoS Genet* **3**: e227.
- 10 Bartel DP. 2004. MicroRNAs: genomics, biogenesis, mechanism, and function. *Cell*  
11 **116**: 281-297.
- 12 Bartel DP. 2018. Metazoan MicroRNAs. *Cell* **173**: 20-51.
- 13 Beavis WD. 1998. QTL analysis: Power, precision, and accuracy. In: Paterson AH,  
14 editor *Molecular dissection of complex traits Boca Raton, FL: CRC Press*.
- 15 Becker WR, Ober-Reynolds B, Jouravleva K, Jolly SM, Zamore PD, Greenleaf WJ.  
16 2019. High-Throughput Analysis Reveals Rules for Target RNA Binding and  
17 Cleavage by AGO2. *Mol Cell* **75**: 741-755 e711.
- 18 Bernstein E, Kim SY, Carmell MA, Murchison EP, Alcorn H, Li MZ, Mills AA,  
19 Elledge SJ, Anderson KV, Hannon GJ. 2003. Dicer is essential for mouse  
20 development. *Nat Genet* **35**: 215-217.
- 21 Brennecke J, Stark A, Russell RB, Cohen SM. 2005. Principles of microRNA-target  
22 recognition. *PLoS Biol* **3**: e85.
- 23 Cancer Genome Atlas Research N, Weinstein JN, Collisson EA, Mills GB, Shaw KR,  
24 Ozenberger BA, Ellrott K, Shmulevich I, Sander C, Stuart JM. 2013. The  
25 Cancer Genome Atlas Pan-Cancer analysis project. *Nat Genet* **45**: 1113-1120.
- 26 Chi SW, Zang JB, Mele A, Darnell RB. 2009. Argonaute HITS-CLIP decodes  
27 microRNA-mRNA interaction maps. *Nature* **460**: 479-486.
- 28 Dang VT, Kassahn KS, Marcos AE, Ragan MA. 2008. Identification of human  
29 haploinsufficient genes and their genomic proximity to segmental duplications.  
30 *Eur J Hum Genet* **16**: 1350-1357.
- 31 Didiano D, Hobert O. 2006. Perfect seed pairing is not a generally reliable predictor for  
32 miRNA-target interactions. *Nat Struct Mol Biol* **13**: 849-851.
- 33 Eulalio A, Mano M. 2015. MicroRNA Screening and the Quest for Biologically  
34 Relevant Targets. *J Biomol Screen* **20**: 1003-1017.
- 35 Firth HV, Richards SM, Bevan AP, Clayton S, Corpas M, Rajan D, Van Vooren S,  
36 Moreau Y, Pettett RM, Carter NP. 2009. DECIPHER: Database of  
37 Chromosomal Imbalance and Phenotype in Humans Using Ensembl Resources.  
38 *Am J Hum Genet* **84**: 524-533.
- 39 Fridrich A, Hazan Y, Moran Y. 2019. Too Many False Targets for MicroRNAs:  
40 Challenges and Pitfalls in Prediction of miRNA Targets and Their Gene  
41 Ontology in Model and Non-model Organisms. *Bioessays* **41**: e1800169.
- 42 Friedman RC, Farh KK, Burge CB, Bartel DP. 2009. Most mammalian mRNAs are  
43 conserved targets of microRNAs. *Genome Res* **19**: 92-105.
- 44 Giraldez AJ, Cinalli RM, Glasner ME, Enright AJ, Thomson JM, Baskerville S,  
45 Hammond SM, Bartel DP, Schier AF. 2005. MicroRNAs regulate brain  
46 morphogenesis in zebrafish. *Science* **308**: 833-838.

- 1 Goldman M, Craft B, Hastie M, Repečka K, McDade F, Kamath A, Banerjee A, Luo  
2 Y, Rogers D, Brooks AN et al. 2019. The UCSC Xena platform for public and  
3 private cancer genomics data visualization and interpretation. *bioRxiv*  
4 doi:10.1101/326470: 326470.
- 5 GTEx Consortium, Laboratory DA, Coordinating Center -Analysis Working G,  
6 Statistical Methods groups-Analysis Working G, Enhancing Gg, Fund NIHC,  
7 Nih/Nci, Nih/Nhgri, Nih/Nimh, Nih/Nida et al. 2017. Genetic effects on gene  
8 expression across human tissues. *Nature* **550**: 204-213.
- 9 Gu S, Jin L, Zhang F, Sarnow P, Kay MA. 2009. Biological basis for restriction of  
10 microRNA targets to the 3' untranslated region in mammalian mRNAs. *Nat*  
11 *Struct Mol Biol* **16**: 144-150.
- 12 Hafner M, Landthaler M, Burger L, Khorshid M, Hausser J, Berninger P, Rothballer A,  
13 Ascano M, Jr., Jungkamp AC, Munschauer M et al. 2010. Transcriptome-wide  
14 identification of RNA-binding protein and microRNA target sites by PAR-CLIP.  
15 *Cell* **141**: 129-141.
- 16 Hausser J, Zavolan M. 2014. Identification and consequences of miRNA-target  
17 interactions--beyond repression of gene expression. *Nat Rev Genet* **15**: 599-612.
- 18 Heidersbach A, Saxby C, Carver-Moore K, Huang Y, Ang YS, de Jong PJ, Ivey KN,  
19 Srivastava D. 2013. microRNA-1 regulates sarcomere formation and suppresses  
20 smooth muscle gene expression in the mammalian heart. *Elife* **2**: e01323.
- 21 Helwak A, Kudla G, Dudnakova T, Tollervey D. 2013. Mapping the human miRNA  
22 interactome by CLASH reveals frequent noncanonical binding. *Cell* **153**: 654-  
23 665.
- 24 Imig J, Brunschweiler A, Brummer A, Guennewig B, Mittal N, Kishore S, Tsikrika P,  
25 Gerber AP, Zavolan M, Hall J. 2015. miR-CLIP capture of a miRNA targetome  
26 uncovers a lincRNA H19-miR-106a interaction. *Nat Chem Biol* **11**: 107-114.
- 27 Juzenas S, Venkatesh G, Hubenthal M, Hoepfner MP, Du ZG, Paulsen M, Rosenstiel  
28 P, Senger P, Hofmann-Apitius M, Keller A et al. 2017. A comprehensive, cell  
29 specific microRNA catalogue of human peripheral blood. *Nucleic Acids Res* **45**:  
30 9290-9301.
- 31 Karagkouni D, Paraskevopoulou MD, Chatzopoulos S, Vlachos IS, Tastsoglou S,  
32 Kanellos I, Papadimitriou D, Kavakiotis I, Maniou S, Skoufos G et al. 2018.  
33 DIANA-TarBase v8: a decade-long collection of experimentally supported  
34 miRNA-gene interactions. *Nucleic Acids Res* **46**: D239-D245.
- 35 Kataoka Y, Takeichi M, Uemura T. 2001. Developmental roles and molecular  
36 characterization of a Drosophila homologue of Arabidopsis Argonaute1, the  
37 founder of a novel gene superfamily. *Genes Cells* **6**: 313-325.
- 38 Lappalainen T, Sammeth M, Friedlander MR, t Hoen PA, Monlong J, Rivas MA,  
39 Gonzalez-Porta M, Kurbatova N, Griebel T, Ferreira PG et al. 2013.  
40 Transcriptome and genome sequencing uncovers functional variation in humans.  
41 *Nature* **501**: 506-511.
- 42 Lewis BP, Burge CB, Bartel DP. 2005. Conserved seed pairing, often flanked by  
43 adenosines, indicates that thousands of human genes are microRNA targets.  
44 *Cell* **120**: 15-20.
- 45 Li X, Pritykin Y, Concepcion CP, Lu Y, Rocca GL, Zhang M, Cook PJ, Au YW, Popow  
46 O, Paulo JA et al. 2019. High-resolution in vivo identification of miRNA targets  
47 by Halo-Enhanced Ago2 Pulldown. *bioRxiv* doi:10.1101/820548: 820548.
- 48 Lin C, Miles WO. 2019. Beyond CLIP: advances and opportunities to measure RBP-  
49 RNA and RNA-RNA interactions. *Nucleic Acids Res* **47**: 5490-5501.

- 1 Lorenz R, Bernhart SH, Honer Zu Siederdisen C, Tafer H, Flamm C, Stadler PF,  
2 Hofacker IL. 2011. ViennaRNA Package 2.0. *Algorithms Mol Biol* **6**: 26.
- 3 McGeary SE, Lin KS, Shi CY, Pham TM, Bisaria N, Kelley GM, Bartel DP. 2019. The  
4 biochemical basis of microRNA targeting efficacy. *Science* **366**.
- 5 Miranda KC, Huynh T, Tay Y, Ang YS, Tam WL, Thomson AM, Lim B, Rigoutsos I.  
6 2006. A pattern-based method for the identification of MicroRNA binding sites  
7 and their corresponding heteroduplexes. *Cell* **126**: 1203-1217.
- 8 Morita S, Horii T, Kimura M, Goto Y, Ochiya T, Hatada I. 2007. One Argonaute family  
9 member, Eif2c2 (Ago2), is essential for development and appears not to be  
10 involved in DNA methylation. *Genomics* **89**: 687-696.
- 11 Ongen H, Buil A, Brown AA, Dermitzakis ET, Delaneau O. 2016. Fast and efficient  
12 QTL mapper for thousands of molecular phenotypes. *Bioinformatics* **32**: 1479-  
13 1485.
- 14 Peterson SM, Thompson JA, Ufkin ML, Sathyanarayana P, Liaw L, Congdon CB. 2014.  
15 Common features of microRNA target prediction tools. *Front Genet* **5**: 23.
- 16 Pinzon N, Li B, Martinez L, Sergeeva A, Presumey J, Apparailly F, Seitz H. 2017.  
17 microRNA target prediction programs predict many false positives. *Genome*  
18 *Res* **27**: 234-245.
- 19 R Development Core Team. 2008. R: A language and environment for statistical  
20 computing. R Foundation for Statistical Computing.
- 21 Schafer M, Ciaudo C. 2020. Prediction of the miRNA interactome - Established  
22 methods and upcoming perspectives. *Comput Struct Biotechnol J* **18**: 548-557.
- 23 Seitz H. 2017. Issues in current microRNA target identification methods. *RNA Biol* **14**:  
24 831-834.
- 25 Sethupathy P, Megraw M, Hatzigeorgiou AG. 2006. A guide through present  
26 computational approaches for the identification of mammalian microRNA  
27 targets. *Nat Methods* **3**: 881-886.
- 28 Stadthagen G, Tehler D, Hoyland-Kroghsbo NM, Wen J, Krogh A, Jensen KT, Santoni-  
29 Rugiu E, Engelholm LH, Lund AH. 2013. Loss of miR-10a activates lpo and  
30 collaborates with activated Wnt signaling in inducing intestinal neoplasia in  
31 female mice. *PLoS Genet* **9**: e1003913.
- 32 Sticht C, De La Torre C, Parveen A, Gretz N. 2018. miRWalk: An online resource for  
33 prediction of microRNA binding sites. *PLoS One* **13**: e0206239.
- 34 Tan JY, Smith AAT, Ferreira da Silva M, Matthey-Doret C, Rueedi R, Sonmez R, Ding  
35 D, Kutalik Z, Bergmann S, Marques AC. 2017. cis-Acting Complex-Trait-  
36 Associated lincRNA Expression Correlates with Modulation of Chromosomal  
37 Architecture. *Cell Rep* **18**: 2280-2288.
- 38 Thomas M, Lieberman J, Lal A. 2010. Desperately seeking microRNA targets. *Nat*  
39 *Struct Mol Biol* **17**: 1169-1174.
- 40 Vasquez-Rifo A, Jannot G, Armisen J, Labouesse M, Bukhari SI, Rondeau EL, Miska  
41 EA, Simard MJ. 2012. Developmental characterization of the microRNA-  
42 specific *C. elegans* Argonautes alg-1 and alg-2. *PLoS One* **7**: e33750.
- 43 Vella MC, Choi EY, Lin SY, Reinert K, Slack FJ. 2004. The *C. elegans* microRNA let-  
44 7 binds to imperfect let-7 complementary sites from the lin-41 3'UTR. *Genes*  
45 *Dev* **18**: 132-137.
- 46 Vösa U, Claringbould A, Westra H-J, Bonder MJ, Deelen P, Zeng B, Kirsten H, Saha  
47 A, Kreuzhuber R, Kasela S et al. 2018. Unraveling the polygenic architecture  
48 of complex traits using blood eQTL metaanalysis. *bioRxiv* doi:10.1101/447367:  
49 447367.



- 1 Wan Y, Qu K, Zhang QC, Flynn RA, Manor O, Ouyang Z, Zhang J, Spitale RC, Snyder  
2 MP, Segal E et al. 2014. Landscape and variation of RNA secondary structure  
3 across the human transcriptome. *Nature* **505**: 706-709.
- 4 Wang L, Michoel T. 2017. Efficient and accurate causal inference with hidden  
5 confounders from genome-transcriptome variation data. *PLoS computational*  
6 *biology* **13**: e1005703.
- 7 Wang Y, Baskerville S, Shenoy A, Babiarz JE, Baehner L, Blelloch R. 2008.  
8 Embryonic stem cell-specific microRNAs regulate the G1-S transition and  
9 promote rapid proliferation. *Nat Genet* **40**: 1478-1483.
- 10 Wessels HH, Lebedeva S, Hirsekorn A, Wurmus R, Akalin A, Mukherjee N, Ohler U.  
11 2019. Global identification of functional microRNA-mRNA interactions in  
12 *Drosophila*. *Nat Commun* **10**: 1626.
- 13 Wienholds E, Koudijs MJ, van Eeden FJ, Cuppen E, Plasterk RH. 2003. The  
14 microRNA-producing enzyme Dicer1 is essential for zebrafish development.  
15 *Nat Genet* **35**: 217-218.
- 16

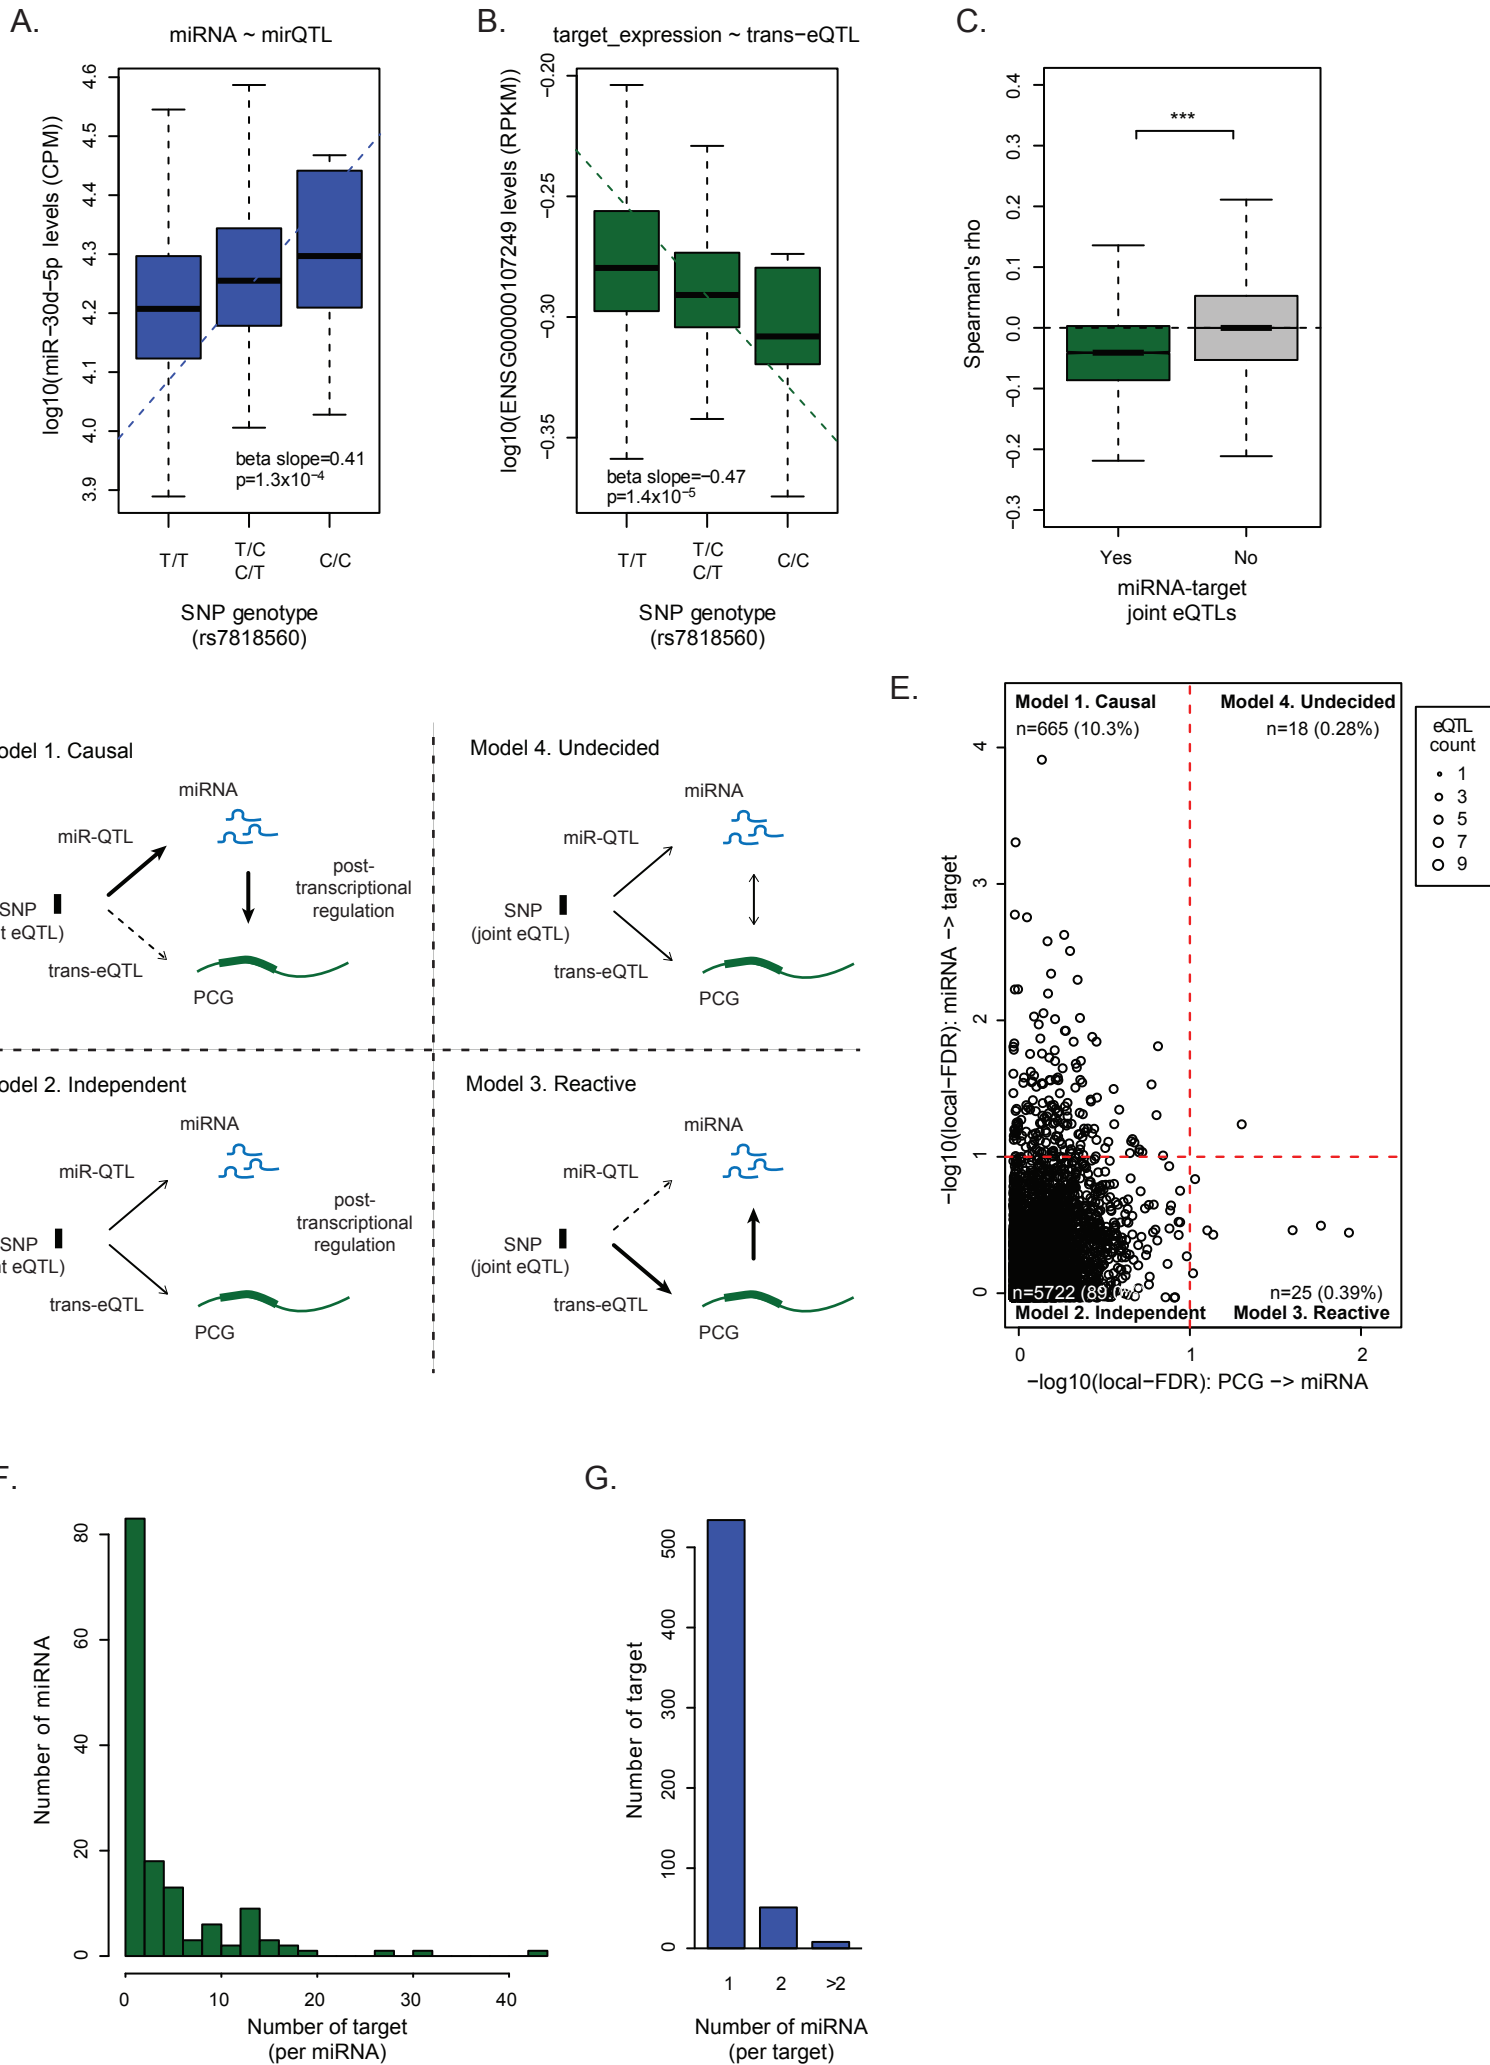

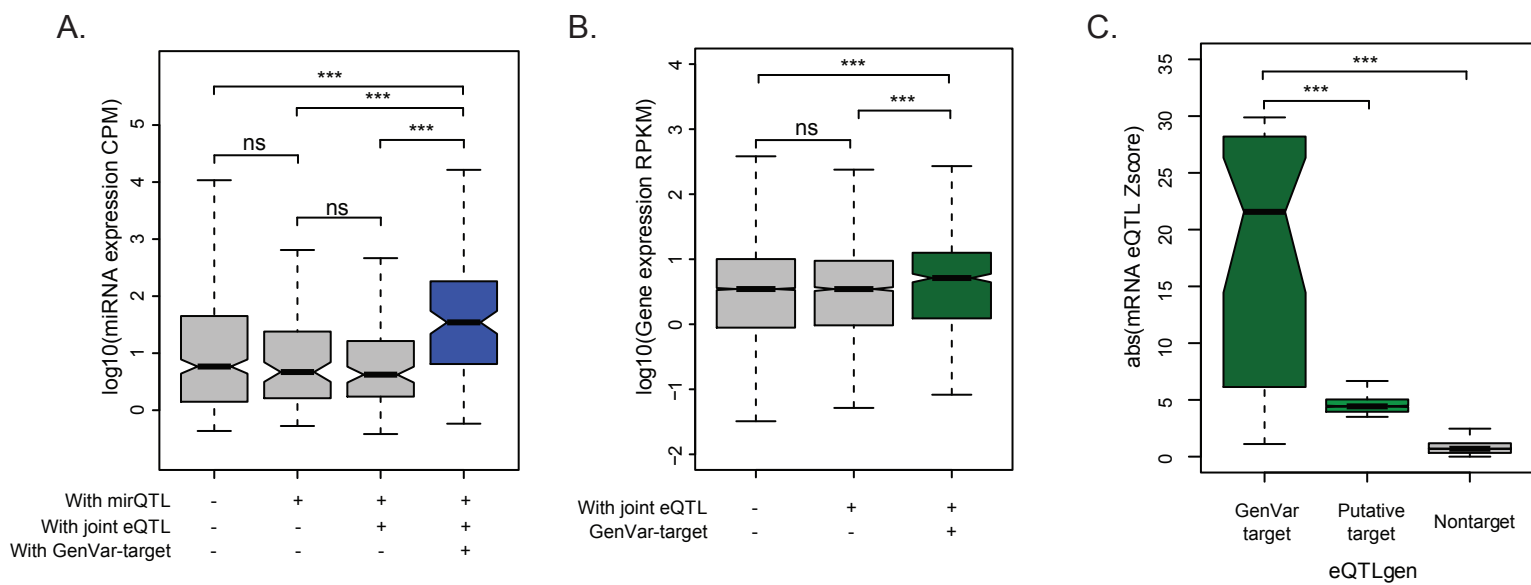

# Figure 3

A.

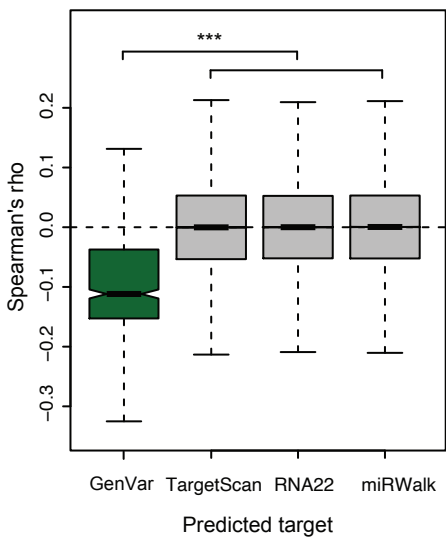

B.

| Prediction tools    | Targets |           |      |
|---------------------|---------|-----------|------|
|                     | Total   | AGO-bound | %    |
| GenVar              | 593     | 158       | 26.6 |
| TargetScan          | 13,842  | 2,379     | 17.2 |
| RNA22               | 13,595  | 2,360     | 17.4 |
| miRWalk             | 13,027  | 2,332     | 17.9 |
| All-expressed genes | 14,847  | 2,389     | 16.1 |

C.

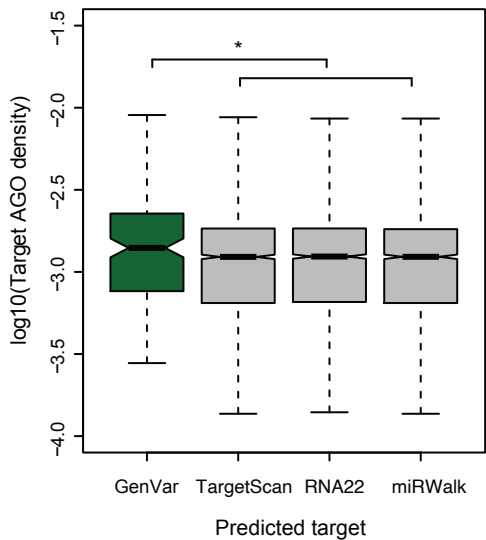

D.

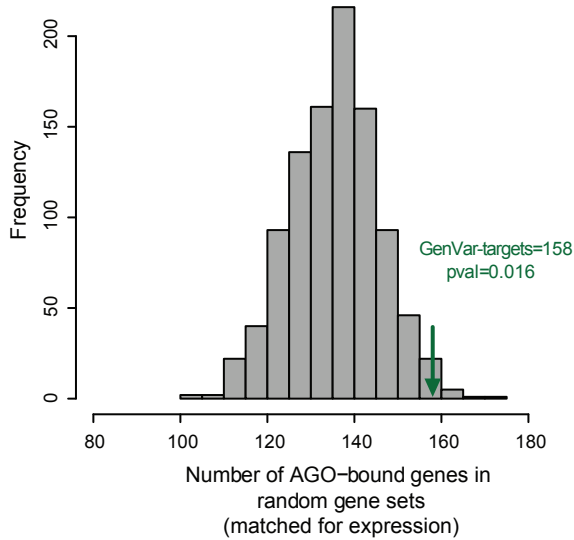

E.

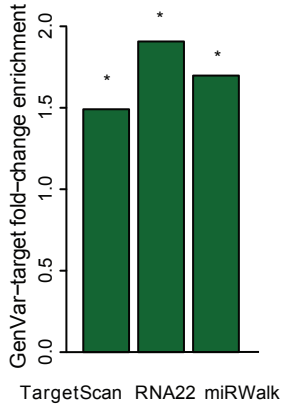

F.

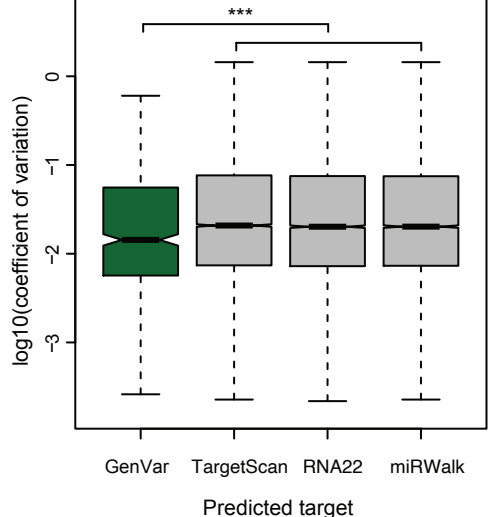

G.

| Prediction tools | Targets |                   |      |
|------------------|---------|-------------------|------|
|                  | Total   | Haploinsufficient | %    |
| GenVar           | 593     | 100               | 16.9 |
| TargetScan       | 13,842  | 1,673             | 12.1 |
| RNA22            | 13,595  | 1,666             | 12.3 |
| miRWalk          | 13,027  | 1,633             | 12.5 |

A.

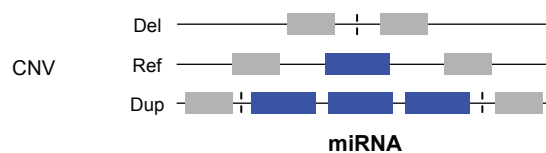

B.

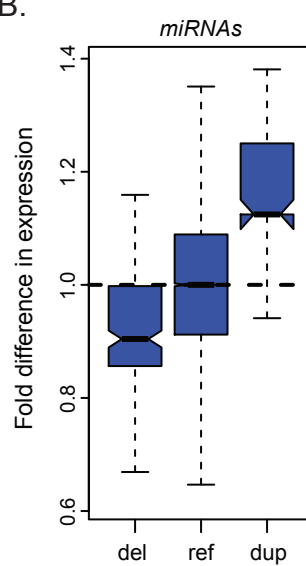

C.

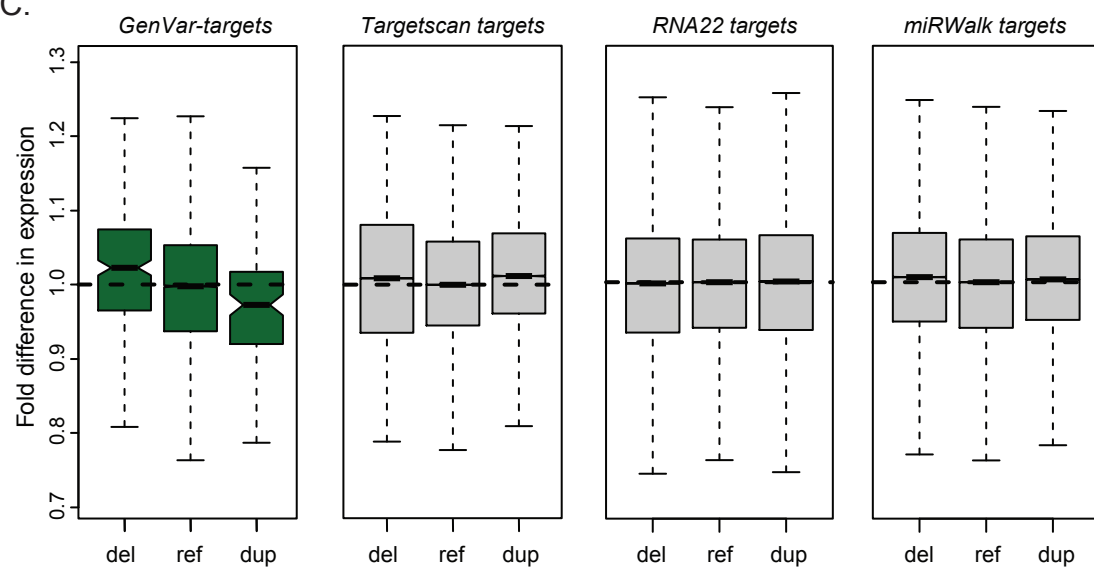

A.

|              | Total | Canonical | %    | Non-Canonical | %    |
|--------------|-------|-----------|------|---------------|------|
| Targets      | 593   | 404       | 68.1 | 187           | 31.9 |
| Interactions | 665   | 447       | 67.2 | 218           | 32.8 |

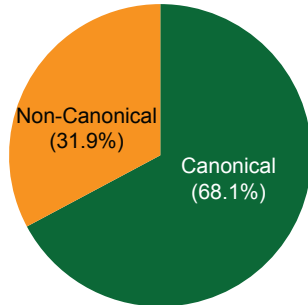

B.

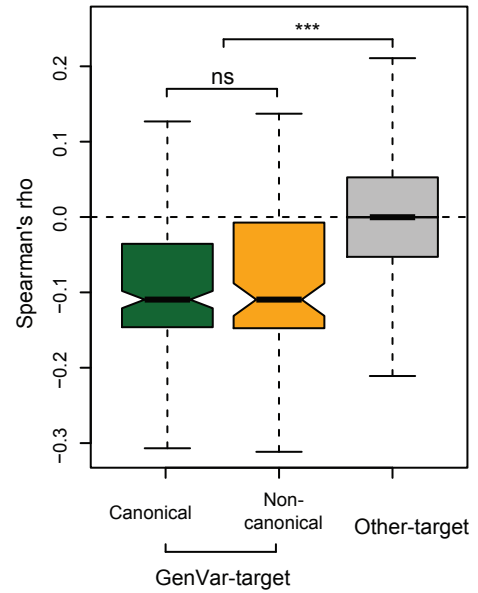

C.

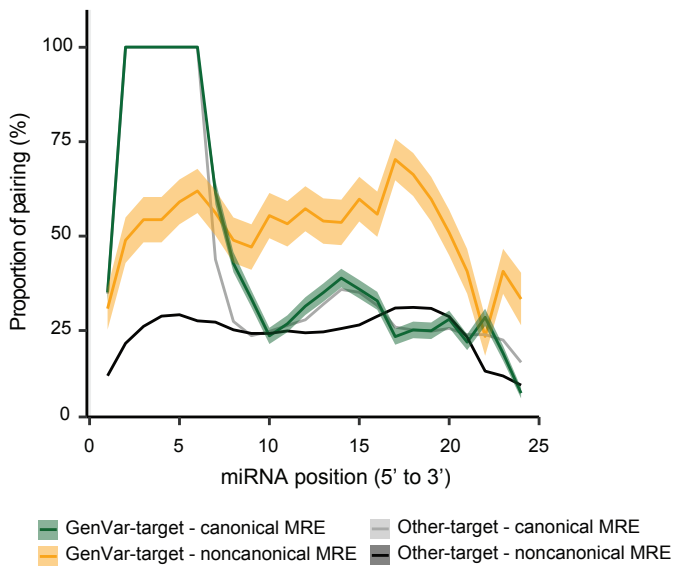

D.

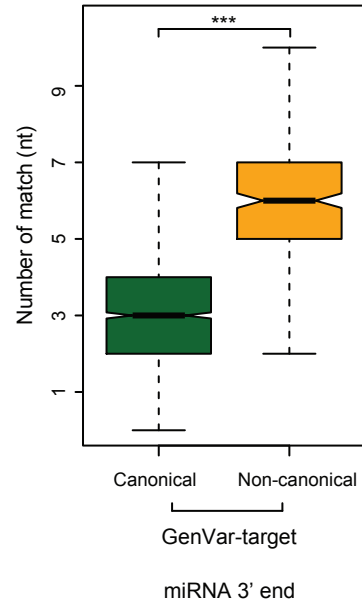

Source: https://www.biorxiv.org/content/10.1101/2020.07.07.191023v1.full.pdf
