# Supplementary material for: Noncanonical targeting contributes significantly to miRNA-mediated regulation
Source: bioRxiv or medRxiv preprint supplement (doi:10.1101/2020.07.07.191023), 2020-07-07

# Supp Figure S3.

A.

| Prediction tools    | # Targets | # Interactions | # miRNAs | # targets per miRNA | # miRNAs per target |
|---------------------|-----------|----------------|----------|---------------------|---------------------|
| GenVar-target       | 593       | 665            | 143      | 5                   | 1                   |
| TargetScan          | 13,842    | 474,114        | 143      | 3348                | 29                  |
| RNA22               | 13,595    | 825,295        | 97       | 9209                | 60                  |
| miRWalk             | 13,027    | 448,787        | 111      | 4259                | 30                  |
| All-expressed genes | 14,847    |                |          |                     |                     |

B.

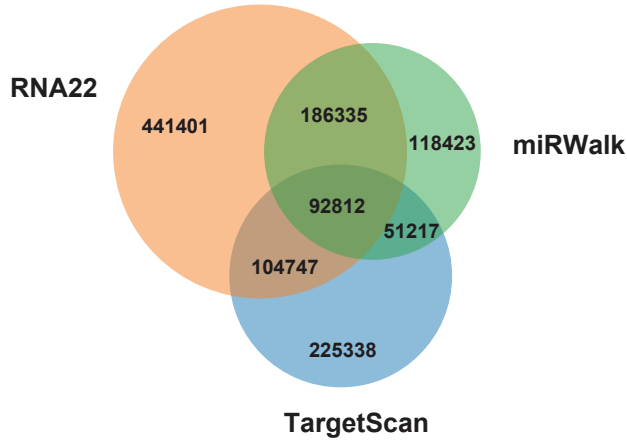

Supplement: Supplementary file [file media-3.pdf]
