# Supplementary material for: Noncanonical targeting contributes significantly to miRNA-mediated regulation
Source: bioRxiv or medRxiv preprint supplement (doi:10.1101/2020.07.07.191023), 2020-07-07

Supp Figure S4.

A.

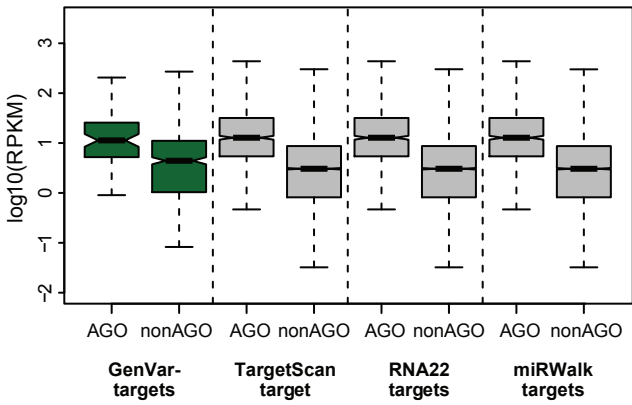

B.

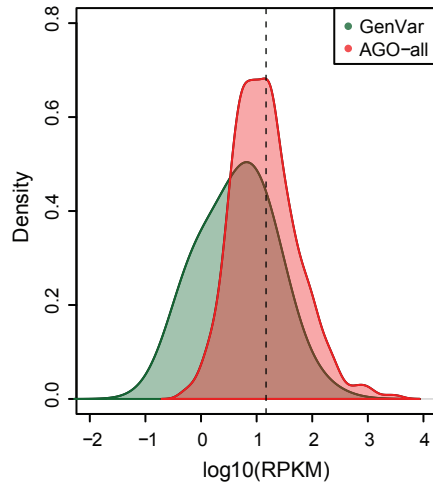

C.

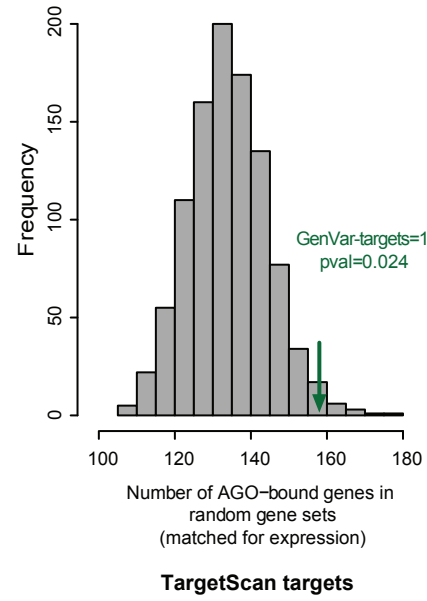

D.

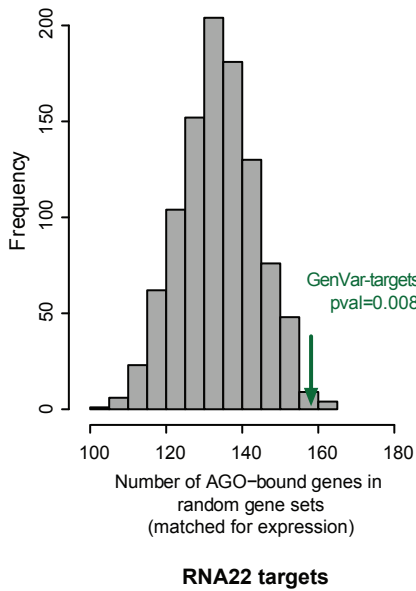

E.

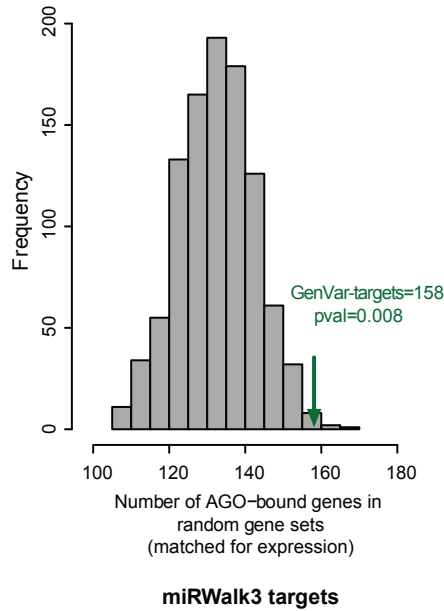

F.

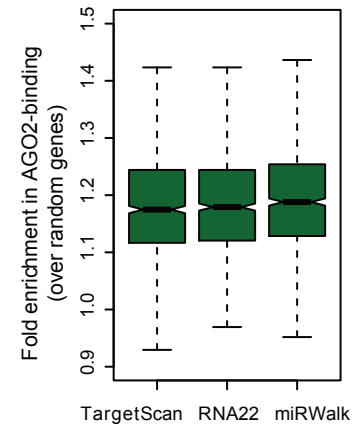

G.

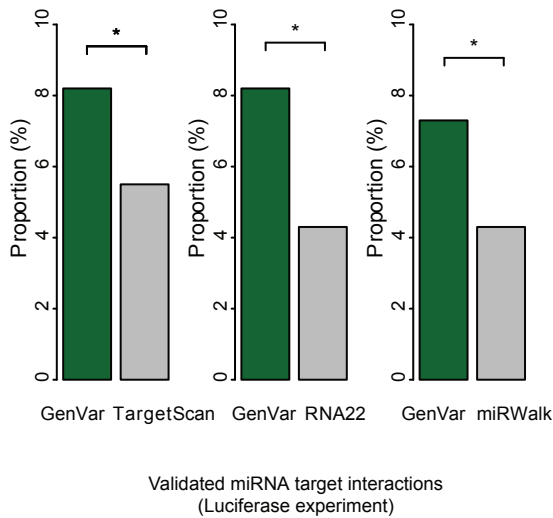

H.

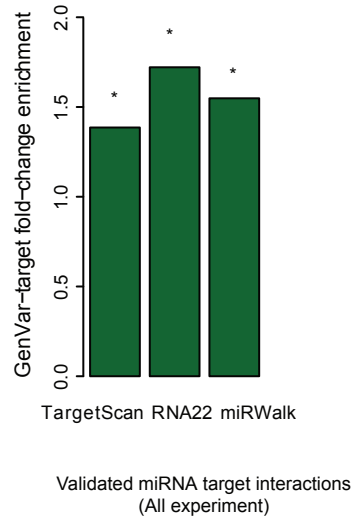

I.

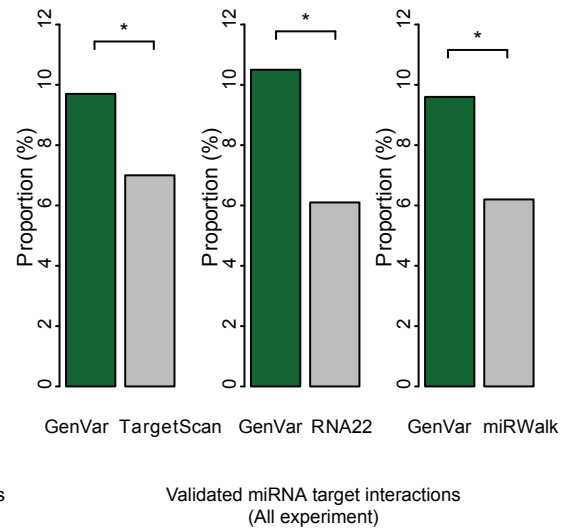

Supplement: Supplementary file [file media-4.pdf]
