# Supplementary material for: Noncanonical targeting contributes significantly to miRNA-mediated regulation
Source: bioRxiv or medRxiv preprint supplement (doi:10.1101/2020.07.07.191023), 2020-07-07

# Supp Figure S5.

A.

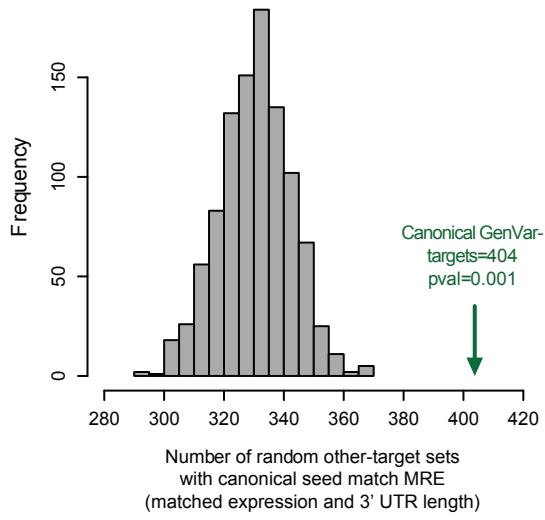

B.

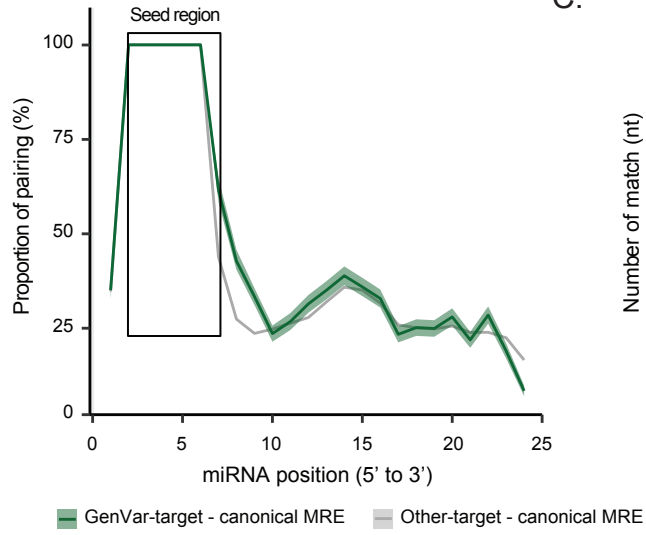

C.

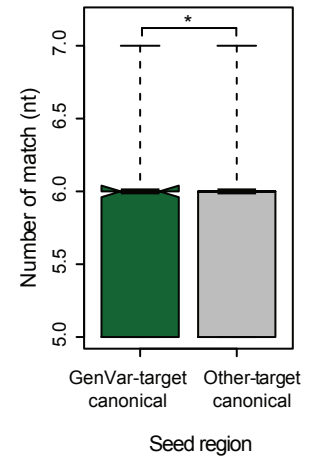

D.

|      | Canonical binding interactions |      |              |      |
|------|--------------------------------|------|--------------|------|
|      | Genvar-target                  | %    | Other-target | %    |
| 8mer | 109                            | 17.3 | 192142       | 13.6 |
| 7mer | 190                            | 30.2 | 345709       | 24.4 |
| 6mer | 331                            | 52.5 | 879102       | 62.0 |

E.

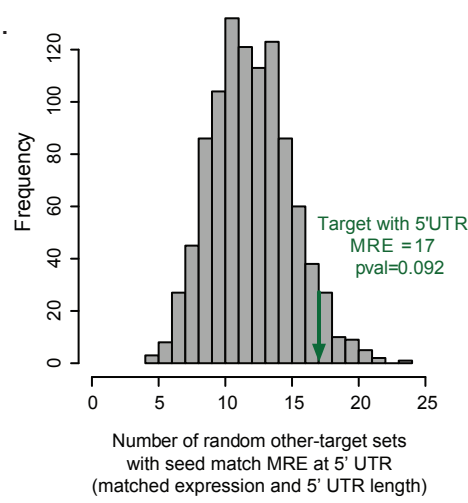

F.

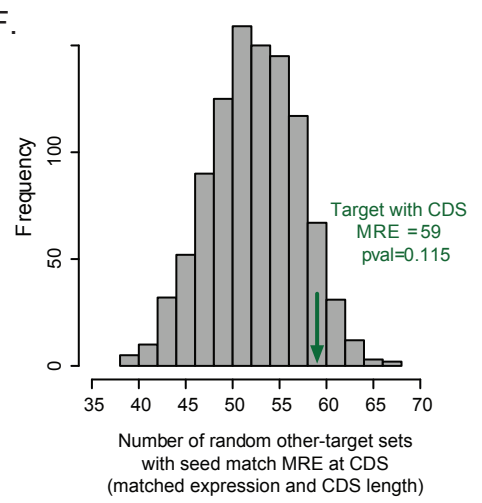

Supplement: Supplementary file [file media-5.pdf]
