# Supplementary material for: Noncanonical targeting contributes significantly to miRNA-mediated regulation
Source: bioRxiv or medRxiv preprint supplement (doi:10.1101/2020.07.07.191023), 2020-07-07

Supp Figure S6.

A.

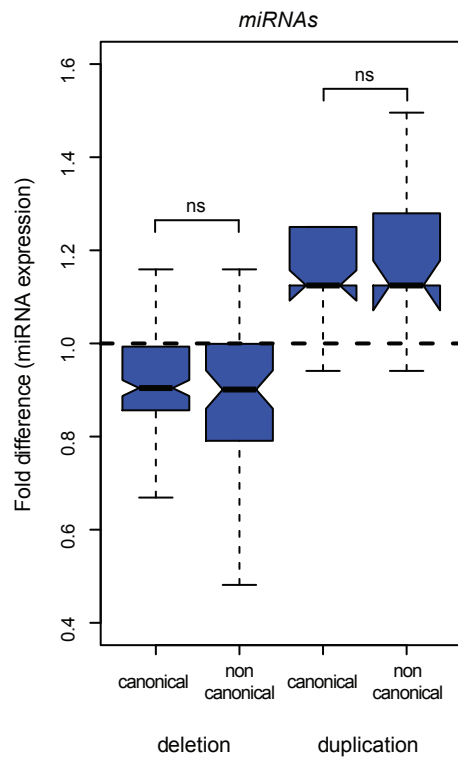

B.

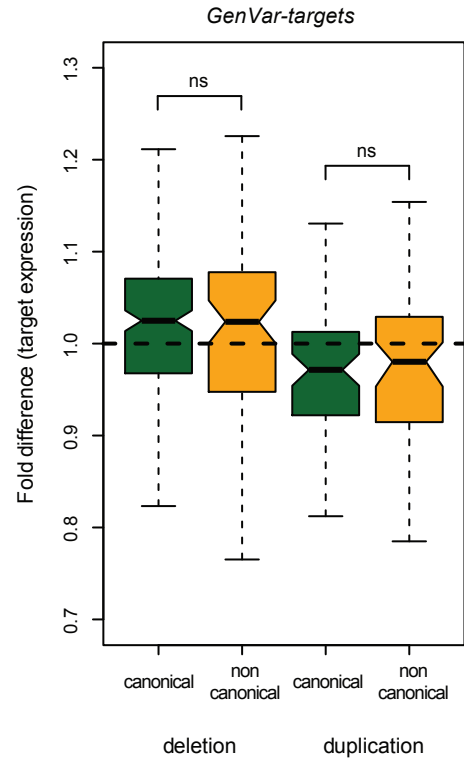

Supplement: Supplementary file [file media-6.pdf]
